# Supplementary material
Source: PubMed Central journal article supplement (PMC9194743)
Supplement: jamainternmed-e222109-s001.pdf [file jamainternmed-e222109-s001.pdf]

## Supplementary Online Content

Dickerman BA, Madenci AL, Gerlovin H, et al. Comparative safety of BNT162b2 and mRNA-1273 vaccines in a nationwide cohort of US veterans. *JAMA Intern Med*. Published online June 13, 2022. doi:10.1001/jamainternmed.2022.2109

**eMethods.** Handling Incident SARS-CoV-2 Infections

**eFigure 1.** Cumulative Incidence of Potential Adverse Events (January 4–October 5, 2021)

**eFigure 2.** Secondary Analysis Without Censoring Incident SARS-CoV-2 Infections During the Follow-up: Cumulative Incidence of Potential Adverse Events (January 4–October 5, 2021)

**eTable 1.** Target Trial Specification and Emulation

**eTable 2.** Study Variables

**eTable 3.** Baseline Characteristics of Eligible vs. Matched Vaccinated Persons

**eTable 4.** Baseline Characteristics of Matched Vaccinated Persons for Each Outcome-Specific Analysis

**eTable 5.** Secondary Analysis Without Censoring Incident SARS-CoV-2 Infections During the Follow-up: Estimated Risks of Potential Adverse Events

**eTable 6.** Secondary Analysis: Evaluating 14-Day Risk

**eTable 7.** Secondary Analysis: Evaluating 42-Day Risk

**eTable 8.** Subgroup Analysis: Among Persons <40 Years of Age

**eTable 9.** Subgroup Analysis: Among Persons 40-69 Years of Age

**eTable 10.** Subgroup Analysis: Among Persons ≥70 Years of Age

**eTable 11.** Subgroup Analysis: Among Persons of Black Race

**eTable 12.** Subgroup Analysis: Among Persons of White Race

**eReference**

This supplementary material has been provided by the authors to give readers additional information about their work.

## eMethods. Handling Incident SARS-CoV-2 Infections

In the primary analysis, we censored individuals if and when they developed a documented SARS-CoV-2 infection and estimated a controlled direct effect of the vaccines on potential adverse events not mediated by infection. That is, these risks reflect potential complications arising only from the vaccines themselves. This estimand refers to a hypothetical population in which SARS-CoV-2 infections do not occur or are independent of the risk of the potential adverse events conditional on the measured variables and may therefore be relevant to decision-making during any future times of less frequent SARS-CoV-2 circulation.

In a secondary analysis, we ignored incident SARS-CoV-2 infections during the follow-up and estimated a total effect of the vaccines on potential adverse events through all causal pathways between the vaccines and outcomes, including those potentially mediated by infection. That is, these risks capture complications arising both from the vaccine themselves and from the incident infections that they are intended to prevent. This estimand may be relevant to decision-making during the acute phase of a pandemic in which the virus is still densely circulating.

eFigure 1. Cumulative Incidence of Potential Adverse Events (January 4–October 5, 2021)

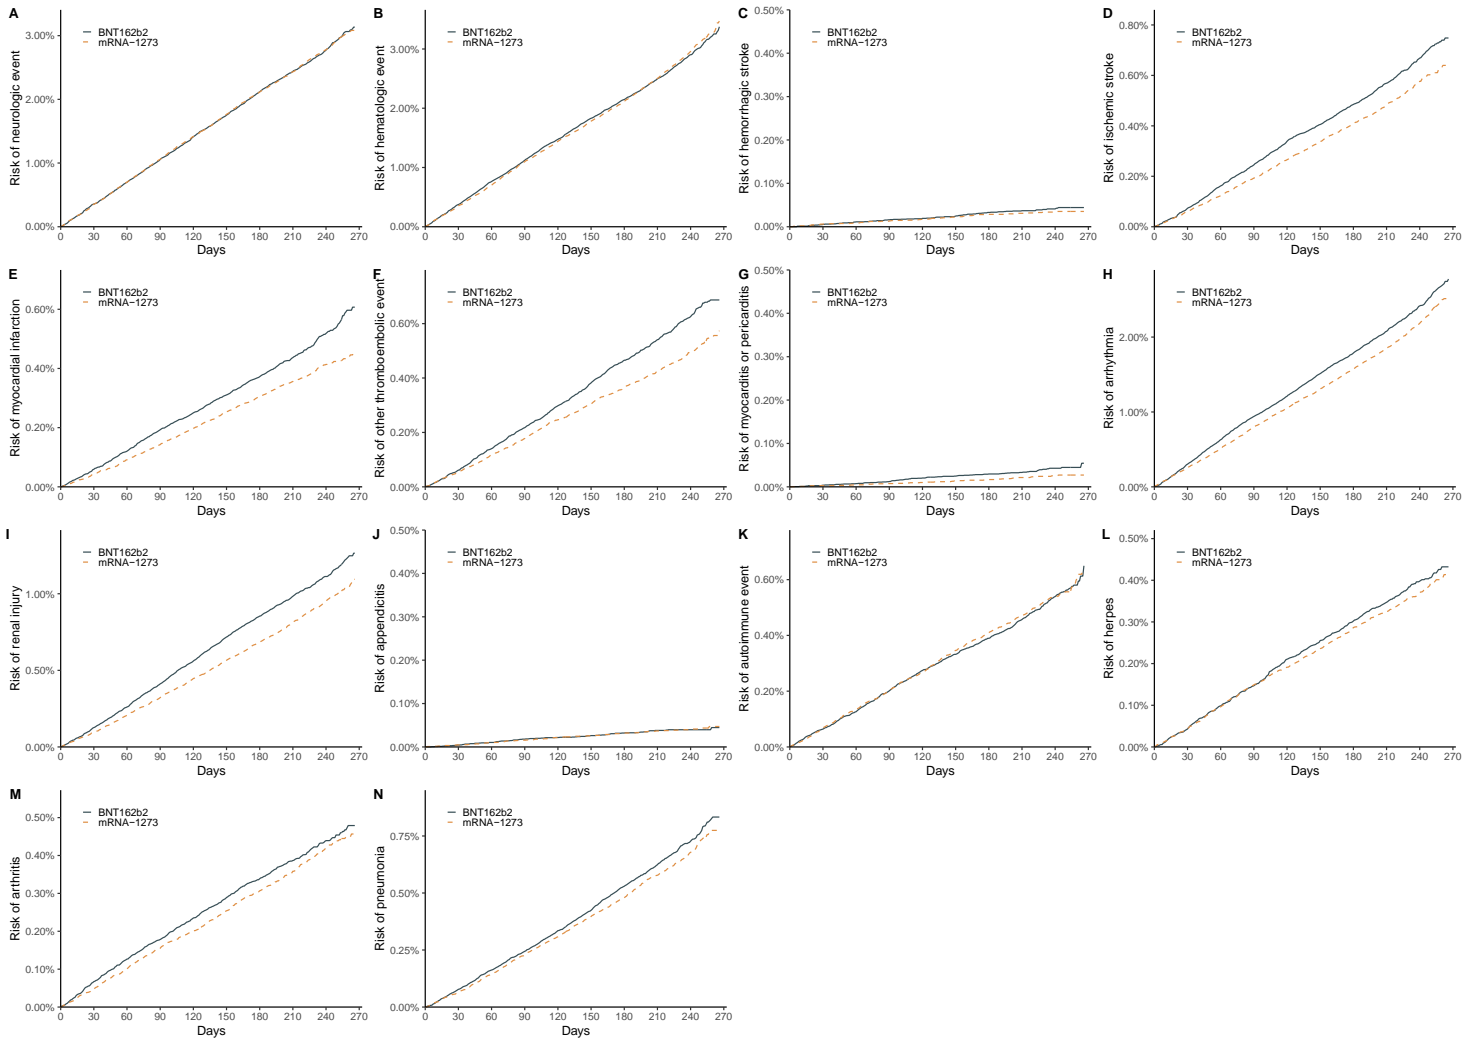

Shaded areas represent pointwise 95% confidence intervals.

eFigure 2. Secondary Analysis Without Censoring Incident SARS-CoV-2 Infections During the Follow-up: Cumulative Incidence of Potential Adverse Events (January 4–October 5, 2021)

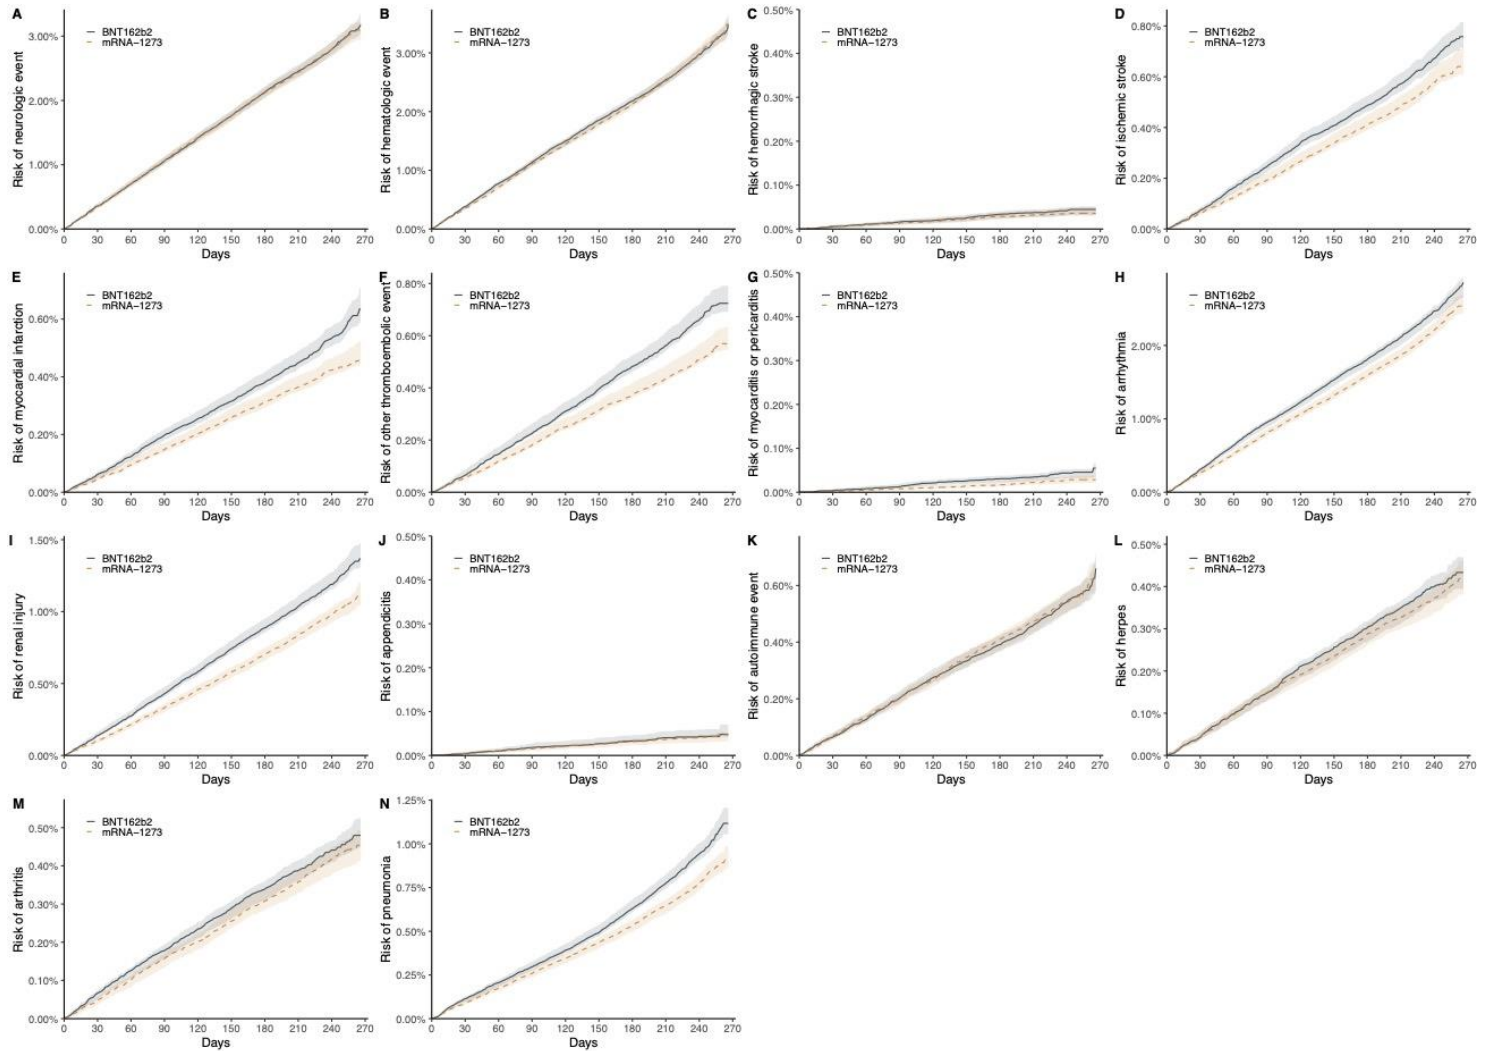

These estimated risks capture complications arising both from the vaccines themselves and from the incident infections that they are intended to prevent. Shaded areas represent pointwise 95% confidence intervals.

eTable 1. Target Trial Specification and Emulation

| <b>eTable 1.</b> Specification and Emulation of Target Trials Evaluating the Comparative Safety of the BNT162b2 and mRNA-1273 Vaccines Using Observational Data from Veterans Health Administration Electronic Health Records (January 4–October 5, 2021). |                                                                                                                                                                                                                                                                                                                                                                                                                                                                                                                                                                                                                                                                                                                                                                                                                                                                                                                                                                                                                                                                                                                                                                                                                                                                   |                                                                                                                                                                                                                                                                                                                                                                                                                                                                                                                                                                                                    |
|------------------------------------------------------------------------------------------------------------------------------------------------------------------------------------------------------------------------------------------------------------|-------------------------------------------------------------------------------------------------------------------------------------------------------------------------------------------------------------------------------------------------------------------------------------------------------------------------------------------------------------------------------------------------------------------------------------------------------------------------------------------------------------------------------------------------------------------------------------------------------------------------------------------------------------------------------------------------------------------------------------------------------------------------------------------------------------------------------------------------------------------------------------------------------------------------------------------------------------------------------------------------------------------------------------------------------------------------------------------------------------------------------------------------------------------------------------------------------------------------------------------------------------------|----------------------------------------------------------------------------------------------------------------------------------------------------------------------------------------------------------------------------------------------------------------------------------------------------------------------------------------------------------------------------------------------------------------------------------------------------------------------------------------------------------------------------------------------------------------------------------------------------|
| Protocol component                                                                                                                                                                                                                                         | Target trial specification                                                                                                                                                                                                                                                                                                                                                                                                                                                                                                                                                                                                                                                                                                                                                                                                                                                                                                                                                                                                                                                                                                                                                                                                                                        | Target trial emulation                                                                                                                                                                                                                                                                                                                                                                                                                                                                                                                                                                             |
| Eligibility criteria                                                                                                                                                                                                                                       | <ul style="list-style-type: none"> <li>• Aged ≥18 years between January 4, 2021, and September 20, 2021</li> <li>• No previously documented Covid-19 vaccination</li> <li>• No interactions with the health care system in the past 3 days, which may indicate the start of symptomatic disease and preclude vaccination</li> <li>• No contraindication for Covid-19 vaccination:               <ul style="list-style-type: none"> <li>○ Severe allergic reaction (e.g., anaphylaxis) or immediate reaction of any severity to the vaccine or any of its components</li> <li>○ Immediate allergic reaction of any severity to polysorbate (due to potential cross-reactive hypersensitivity with the vaccine ingredient PEG)</li> </ul> </li> <li>• No previously documented positive SARS-CoV-2 PCR test</li> <li>• No history of the potential adverse event of interest</li> <li>• Known residential address</li> <li>• Not in a long-term care facility</li> <li>• User of VA health care system (defined as receiving care at a station eligible to administer the vaccines under study and having at least one in-person or telehealth primary care visit in the past year)</li> <li>• Known smoking status and body mass index in the past year</li> </ul> | <p>Same as for the target trial, except:</p> <ul style="list-style-type: none"> <li>• We identified previously documented SARS-CoV-2 infections using the VA Covid-19 National Surveillance Tool,<sup>1</sup> which integrates data on PCR laboratory tests with natural language processing of clinical notes to capture diagnoses inside and outside the VA system.</li> <li>• Data on the listed allergic reactions are not consistently available for all Veterans, but we assumed that receiving the vaccine indicates there was a determination of no previous allergic reaction.</li> </ul> |
| Treatment strategies                                                                                                                                                                                                                                       | <p>(1) Receive one dose of BNT162b2 vaccine at baseline and an additional dose scheduled 21 days later, or</p> <p>(2) Receive one dose of mRNA-1273 vaccine at baseline and an additional dose scheduled 28 days later.</p> <p>Under each treatment strategy, individuals must not be diagnosed with SARS-CoV-2 infection during the follow-up.</p>                                                                                                                                                                                                                                                                                                                                                                                                                                                                                                                                                                                                                                                                                                                                                                                                                                                                                                               | <p>Same as for the target trial. We defined the date of vaccination using records in both the <i>Immunization</i> domain and procedures recorded in the <i>Outpatient</i> or <i>Inpatient</i> domains. There was strict adherence to vaccine deployment protocols in this population.*</p>                                                                                                                                                                                                                                                                                                         |

|                      |                                                                                                                                                                                                                                                                                                                                                                                                                                                                                                                                                                                                                                                                                                                                                                                                                                                                                                                                                                                                           |                                                                                                                                                                                                                                                                      |
|----------------------|-----------------------------------------------------------------------------------------------------------------------------------------------------------------------------------------------------------------------------------------------------------------------------------------------------------------------------------------------------------------------------------------------------------------------------------------------------------------------------------------------------------------------------------------------------------------------------------------------------------------------------------------------------------------------------------------------------------------------------------------------------------------------------------------------------------------------------------------------------------------------------------------------------------------------------------------------------------------------------------------------------------|----------------------------------------------------------------------------------------------------------------------------------------------------------------------------------------------------------------------------------------------------------------------|
| Treatment assignment | Individuals are randomly assigned to a strategy at baseline within strata defined by calendar date (5-day bins), age (5-year bins), sex (male, female), race (white, black, other, unknown), urbanicity of residence (urban, not urban), and geographic location coded as 19 categories of Veterans Integrated Services Network. Individuals will be aware of the assigned treatment strategy.                                                                                                                                                                                                                                                                                                                                                                                                                                                                                                                                                                                                            | We assumed random assignment after matching individuals who were vaccinated with the BNT162b2 vaccine in a 1:1 ratio to eligible individuals vaccinated with the mRNA-1273 vaccine, using the same factors used for stratified randomization as in the target trial. |
| Outcomes             | <ul style="list-style-type: none"> <li>• <i>Neurologic event</i>: Bell's palsy, non-facial paralysis, paresthesia, seizure, syncope, vertigo</li> <li>• <i>Hematologic event</i>: anemia, lymphopenia, neutropenia, thrombocytopenia</li> <li>• Hemorrhagic stroke</li> <li>• Ischemic stroke</li> <li>• Myocardial infarction</li> <li>• <i>Other thromboembolic event</i>: cerebral venous sinus thrombosis, deep venous thrombosis or thrombophlebitis, pulmonary embolism, other thrombosis (arterial embolism and thrombosis, vascular insufficiency of the intestine)</li> <li>• Myocarditis or pericarditis</li> <li>• Arrhythmia</li> <li>• Kidney injury</li> <li>• Appendicitis</li> <li>• <i>Autoimmune event</i>: Guillain-Barré syndrome, inflammatory bowel disease, multiple sclerosis, psoriasis, rheumatoid arthritis, systemic lupus erythematosus, uveitis</li> <li>• <i>Herpes</i>: herpes simplex, herpes zoster</li> <li>• Arthritis or arthropathy</li> <li>• Pneumonia</li> </ul> | Same as for the target trial. We defined diagnoses using records in <i>Inpatient</i> , <i>Outpatient</i> , and <i>Fee</i> domains.                                                                                                                                   |
| Follow-up            | For each person, follow-up starts on the day of vaccination (baseline) and ends on the day of the outcome of interest, censoring (due to diagnosis with SARS-CoV-2 infection), 266 days (38 weeks) after baseline, or the end of the study period (October 5, 2021), whichever happens first.                                                                                                                                                                                                                                                                                                                                                                                                                                                                                                                                                                                                                                                                                                             | Same as for the target trial.                                                                                                                                                                                                                                        |
| Causal contrasts     | Intention-to-treat effect.<br>Per-protocol effect, i.e., the effect if all individuals had received the vaccination they were assigned to at baseline and the corresponding second dose at the scheduled time.                                                                                                                                                                                                                                                                                                                                                                                                                                                                                                                                                                                                                                                                                                                                                                                            | Observational analogue of the per-protocol effect.                                                                                                                                                                                                                   |

|                                                                                                                                                                                                                                                                                                                                                                                                                                                                                                                         |                                                                                                                                                                                      |                               |
|-------------------------------------------------------------------------------------------------------------------------------------------------------------------------------------------------------------------------------------------------------------------------------------------------------------------------------------------------------------------------------------------------------------------------------------------------------------------------------------------------------------------------|--------------------------------------------------------------------------------------------------------------------------------------------------------------------------------------|-------------------------------|
| Statistical analysis                                                                                                                                                                                                                                                                                                                                                                                                                                                                                                    | Cumulative incidence (risk) curves and estimates of 38-week risk, risk differences, and risk ratios comparing the vaccination groups.<br>Subgroup analyses by baseline age and race. | Same as for the target trial. |
| Abbreviations: Covid-19, coronavirus disease 2019; PCR, polymerase chain reaction; SARS-CoV-2, severe acute respiratory syndrome coronavirus 2.                                                                                                                                                                                                                                                                                                                                                                         |                                                                                                                                                                                      |                               |
| * Among persons who received a dose of the BNT162b2 vaccine and had at least 21 days of follow-up, 98% received a second dose of the vaccine (of whom 92% received it before day 24 and 96% received it before day 28). Among persons who received a dose of the mRNA-1273 vaccine and had at least 28 days of follow-up, 98% received a second dose of the vaccine (of whom 92% received it before day 31 and 97% received it before day 35). Therefore, we defined treatment strategies based on the first dose only. |                                                                                                                                                                                      |                               |

eTable 2. Study Variables

| <b>eTable 2.</b> Variables Used in the Analysis when Emulating Target Trials Evaluating the Comparative Safety of the BNT162b2 and mRNA-1273 Vaccines Using Observational Data from Veterans Health Administration Electronic Health Records (January 4–October 5, 2021). |                        |                                                                   |                                                                                                                                                                                                                                                                                                                                                                                                                                                                         |              |
|---------------------------------------------------------------------------------------------------------------------------------------------------------------------------------------------------------------------------------------------------------------------------|------------------------|-------------------------------------------------------------------|-------------------------------------------------------------------------------------------------------------------------------------------------------------------------------------------------------------------------------------------------------------------------------------------------------------------------------------------------------------------------------------------------------------------------------------------------------------------------|--------------|
| <b>Variable</b>                                                                                                                                                                                                                                                           | <b>Functional form</b> | <b>Values</b>                                                     | <b>Detail</b>                                                                                                                                                                                                                                                                                                                                                                                                                                                           | <b>Codes</b> |
| <b>Time-fixed (baseline)*</b>                                                                                                                                                                                                                                             |                        |                                                                   |                                                                                                                                                                                                                                                                                                                                                                                                                                                                         |              |
| Age (years)                                                                                                                                                                                                                                                               | Linear                 | N/A                                                               | Based on records in the <i>Patient</i> domain.                                                                                                                                                                                                                                                                                                                                                                                                                          | N/A          |
| Sex                                                                                                                                                                                                                                                                       | Indicator              | Male/Female                                                       | Based on records in the <i>Patient</i> domain.                                                                                                                                                                                                                                                                                                                                                                                                                          | N/A          |
| Race                                                                                                                                                                                                                                                                      | 4 categories           | White<br>Black<br>Other<br>Unknown                                | In the case of multiple reported races, the most frequently reported race was selected. Based on records in the <i>Patient</i> domain.                                                                                                                                                                                                                                                                                                                                  | N/A          |
| Ethnicity                                                                                                                                                                                                                                                                 | 3 categories           | Not Hispanic<br>Hispanic<br>Unknown                               | In the case of multiple reported ethnicities, the most frequently reported ethnicity was selected. Based on records in the <i>Patient</i> domain.                                                                                                                                                                                                                                                                                                                       | N/A          |
| Veterans Integrated Services Network (VISN)                                                                                                                                                                                                                               | 19 categories          | 19 VISNs representing different geographic regions of the country | Defined as the location of the most recent station utilized prior to baseline. In the case of multiple station visits on the most recent visit date prior to baseline, the station with the most visits on that day was selected. In the case of a tie, the most commonly visited station in the past year was selected among those tied. In the case of another tie, a random station was selected among those tied. Based on records in the <i>Outpatient</i> domain. | N/A          |



**eTable 2.** Variables Used in the Analysis when Emulating Target Trials Evaluating the Comparative Safety of the BNT162b2 and mRNA-1273 Vaccines Using Observational Data from Veterans Health Administration Electronic Health Records (January 4–October 5, 2021).

| Variable                                                      | Functional form | Values | Detail                                                                                                                                                                                                            | Codes                                                                                                                                                                    |
|---------------------------------------------------------------|-----------------|--------|-------------------------------------------------------------------------------------------------------------------------------------------------------------------------------------------------------------------|--------------------------------------------------------------------------------------------------------------------------------------------------------------------------|
| Received care at a station that offered the BNT162b2 vaccine  | Indicator       | Yes/No | Defined using the history of stations utilized prior to baseline. Assessed daily. Based on records in the <i>Patient</i> domain.                                                                                  | N/A                                                                                                                                                                      |
| Received care at a station that offered the mRNA-1273 vaccine | Indicator       | Yes/No | Defined using the history of stations utilized prior to baseline. Assessed daily. Based on records in the <i>Patient</i> domain.                                                                                  | N/A                                                                                                                                                                      |
| Primary care visit in the past year                           | Indicator       | Yes/No | Defined as an in-person or telehealth primary care visit, based on stop codes in any position. Based on records in the <i>Outpatient</i> domain.                                                                  | PCP: 301, 322, 323, 348, 350<br>Tele-PCP: 338                                                                                                                            |
| Interaction with health care system within the past 3 days    | Indicator       | Yes/No | Defined as a primary care, inpatient, or emergency room visit, based on stop codes in the primary position. Assessed daily. Based on records in the <i>Inpatient</i> and <i>Outpatient</i> domains.               | PCP: 301, 322, 323, 348, 350<br>ER: 1, 101, 130, 131                                                                                                                     |
| In long-term care within the past 2 years                     | Indicator       | Yes/No | Includes admissions and inpatient transfers to or from a community living center (nursing home or domiciliary) or non-VA community nursing home. Based on records in the <i>Inpatient</i> and <i>Fee</i> domains. | Inpatient sources:<br>AdmitSourceName, PlaceOfAdmit,<br>MedicalService, Specialty,<br>BedSection<br><i>Fee</i> domain: FeePurposeOfVisit or<br>AustinCode in 40-44 or 89 |
| Known residential address in the past year                    | Indicator       | Yes/No | Based on Homeless Services Registry algorithm codes,                                                                                                                                                              | Stop codes: 504, 507, 508, 511,<br>522, 528, 529, 530, 590, 591, 592                                                                                                     |

**eTable 2.** Variables Used in the Analysis when Emulating Target Trials Evaluating the Comparative Safety of the BNT162b2 and mRNA-1273 Vaccines Using Observational Data from Veterans Health Administration Electronic Health Records (January 4–October 5, 2021).

| Variable                                             | Functional form | Values                       | Detail                                                                                                                                                                                                         | Codes                                                                                                                                              |
|------------------------------------------------------|-----------------|------------------------------|----------------------------------------------------------------------------------------------------------------------------------------------------------------------------------------------------------------|----------------------------------------------------------------------------------------------------------------------------------------------------|
|                                                      |                 |                              | using stop codes, specialty codes, ICD10 diagnosis codes, and adjudicated health factor codes. Based on records in the <i>Inpatient, Outpatient, Fee, and Health Factors</i> domains.                          | Specialty codes: 25-29, 37-39, 85, 86, 88, 109-111<br>ICD10: V60.0, Z59.0                                                                          |
| Urban residence                                      | Indicator       | Yes/No                       | Defined as having an address with a GIS zip code considered to be urban. Based on records in the <i>Patient</i> domain.                                                                                        | N/A                                                                                                                                                |
| Number of influenza vaccinations in the past 5 years | 4 categories    | 0<br>1-2<br>3-4<br>≥5        | Based on records in the <i>Immunization</i> domain.                                                                                                                                                            | CVX codes: 15-17, 69, 88, 111, 123, 125-128, 135, 140, 141, 144, 149-151, 153, 155, 158, 160, 161, 166, 168, 171, 185, 186, 194, 197, 200-202, 205 |
| Number of primary care visits in the past 5 years    | 4 categories    | 1-9<br>10-19<br>20-29<br>≥30 | Defined using stop codes, with PCP or Tele-PCP in the primary position, or in the secondary position if the primary position had a Tele-PCP combo stop code. Based on records in the <i>Outpatient</i> domain. | PCP: 301, 322, 323, 348, 350<br>Tele-PCP: 338<br>Tele-PCP combo: 147, 182, 324, 326, 683                                                           |
| Body mass index (kg/m <sup>2</sup> )                 | Linear          | N/A                          | Calculated using the most recent height and weight measurements. Based on records in the <i>Vital Signs</i> domain.                                                                                            | N/A                                                                                                                                                |
| Obesity (body mass index ≥30 kg/m <sup>2</sup> )     | Indicator       | Yes/No                       | Based on the most recent body mass index in the past year. Based on records in the <i>Vital Signs</i> domain.                                                                                                  | N/A                                                                                                                                                |

**eTable 2.** Variables Used in the Analysis when Emulating Target Trials Evaluating the Comparative Safety of the BNT162b2 and mRNA-1273 Vaccines Using Observational Data from Veterans Health Administration Electronic Health Records (January 4–October 5, 2021).

| Variable                               | Functional form | Values                     | Detail                                                                                                                                                                                                                                                                                                                   | Codes                                                                                                |
|----------------------------------------|-----------------|----------------------------|--------------------------------------------------------------------------------------------------------------------------------------------------------------------------------------------------------------------------------------------------------------------------------------------------------------------------|------------------------------------------------------------------------------------------------------|
| Smoking status                         | 3 categories    | Never<br>Current<br>Former | Defined as the most common self-reported smoking status prior to baseline. Based on records in the <i>Health Factors</i> domain.                                                                                                                                                                                         |                                                                                                      |
| Chronic lung disease                   | Indicator       | Yes/No                     | A flag for at least one of the following conditions: asthma, bronchitis, chronic obstructive pulmonary disorder. Each component described below is based on records in the <i>Inpatient</i> , <i>Outpatient</i> , and <i>Fee</i> domains.                                                                                | See below                                                                                            |
| Asthma                                 | Indicator       | Yes/No                     | Defined as $\geq 2$ diagnoses in the past 2 years.                                                                                                                                                                                                                                                                       | ICD10: J45.%                                                                                         |
| Bronchitis                             | Indicator       | Yes/No                     | Defined as $\geq 2$ diagnoses in the past 2 years.                                                                                                                                                                                                                                                                       | ICD10: J20.%, J21.%, J40.%, J41.%, J42.%                                                             |
| Chronic obstructive pulmonary disorder | Indicator       | Yes/No                     | Defined as $\geq 2$ diagnoses in the past 2 years.                                                                                                                                                                                                                                                                       | ICD10: J41.0%, J41.1%, J41.8%, J42.%, J43.0%, J43.1%, J43.2%, J43.8%, J43.9%, J44.0%, J44.1%, J44.9% |
| Cardiovascular disease                 | Indicator       | Yes/No                     | A flag for at least one of the following conditions: acute myocardial infarction, cardiomyopathy, cerebrovascular accident, coronary heart disease, heart failure, peripheral vascular disease. Each component described below is based on records in the <i>Inpatient</i> , <i>Outpatient</i> , and <i>Fee</i> domains. | See below                                                                                            |

**eTable 2.** Variables Used in the Analysis when Emulating Target Trials Evaluating the Comparative Safety of the BNT162b2 and mRNA-1273 Vaccines Using Observational Data from Veterans Health Administration Electronic Health Records (January 4–October 5, 2021).

| Variable                    | Functional form | Values | Detail                                                                                                              | Codes                                                                                                                                                                                                                 |
|-----------------------------|-----------------|--------|---------------------------------------------------------------------------------------------------------------------|-----------------------------------------------------------------------------------------------------------------------------------------------------------------------------------------------------------------------|
| Acute myocardial infarction | Indicator       | Yes/No | Defined as ≥2 diagnoses in the past 2 years.                                                                        | ICD10: I21.% (not including I21.A%), I22.%                                                                                                                                                                            |
| Cardiomyopathy              | Indicator       | Yes/No | Defined as ≥2 diagnoses in the past 2 years.                                                                        | ICD10: I42.%, I43.%                                                                                                                                                                                                   |
| Cerebrovascular accident    | Indicator       | Yes/No | Defined as ≥2 diagnoses in the past 2 years.                                                                        | ICD10: I60.%-I69.%, G45.%, G46.%, H34.0                                                                                                                                                                               |
| Coronary heart disease      | Indicator       | Yes/No | Defined as ≥2 diagnoses in the past 2 years.                                                                        | ICD10: I20.%, I21.%, I24.%, I25.10, I25.110, I25.2, I25.3, I25.41, I25.42, I25.5, I25.700, I25.710, I25.720, I25.730, I25.750, I25.760, I25.790, I25.810, I25.811, I25.812, I25.82, I25.83, I25.84, I25.89, I25.9     |
| Heart failure               | Indicator       | Yes/No | Defined as ≥2 diagnoses in the past 2 years.                                                                        | ICD10: I11.0, I13.0, I13.2, I50.20, I50.21, I50.22, I50.23, I50.30, I50.31, I50.32, I50.33, I50.40, I50.41, I50.42, I50.43, I50.814, I50.9, I50.1, I50.810, I50.811, I50.812, I50.813, I50.82, I50.83, I50.84, I50.89 |
| Peripheral vascular disease | Indicator       | Yes/No | Defined as ≥2 diagnoses in the past 2 years.                                                                        | ICD10: I70.%, I71.%, I73.9, Z95.8, Z95.9, I73.1, I73.8, I77.1, I79.0, I79.2, K55.1, K55.8, K55.9                                                                                                                      |
| Hypertension                | Indicator       | Yes/No | Defined as ≥2 diagnoses in the past 2 years. Based on records in the <i>Inpatient, Outpatient, and Fee</i> domains. | ICD10: I10.%-I13.%, I15.%, I16.%                                                                                                                                                                                      |
| Diabetes                    | Indicator       | Yes/No | Defined as ≥2 diagnoses in the past 2 years. Based on records in the <i>Inpatient, Outpatient, and Fee</i> domains. | ICD10: E08.%, E10.%, E11.%, E13.%                                                                                                                                                                                     |
| Chronic kidney disease      | Indicator       | Yes/No | Defined as ≥2 diagnoses in the past 2 years. Based on records in the <i>Inpatient, Outpatient, and Fee</i> domains. | ICD10: I12.0, I13.1, N03.2%-N03.7%, N18.%, N19.%, N05.2%-N05.7%, N25.0, Z49.0% - Z49.2%, Z94.0, Z99.2                                                                                                                 |

**eTable 2.** Variables Used in the Analysis when Emulating Target Trials Evaluating the Comparative Safety of the BNT162b2 and mRNA-1273 Vaccines Using Observational Data from Veterans Health Administration Electronic Health Records (January 4–October 5, 2021).

| Variable                | Functional form | Values | Detail                                                                                                                                                                                                                                                                                                                                                                                                                                                                        | Codes                                                                                                                                                                                                                                                                                                                                                                                                                                                                                                                                                                                                                                                                                                                                                                                                    |
|-------------------------|-----------------|--------|-------------------------------------------------------------------------------------------------------------------------------------------------------------------------------------------------------------------------------------------------------------------------------------------------------------------------------------------------------------------------------------------------------------------------------------------------------------------------------|----------------------------------------------------------------------------------------------------------------------------------------------------------------------------------------------------------------------------------------------------------------------------------------------------------------------------------------------------------------------------------------------------------------------------------------------------------------------------------------------------------------------------------------------------------------------------------------------------------------------------------------------------------------------------------------------------------------------------------------------------------------------------------------------------------|
| Liver disease           | Indicator       | Yes/No | Defined as $\geq 2$ diagnoses in the past 2 years. Based on records in the <i>Inpatient</i> , <i>Outpatient</i> , and <i>Fee</i> domains.                                                                                                                                                                                                                                                                                                                                     | ICD10: K72.1%, K72.9%, K76.6%, K76.7%, I85.0%, I85.9%, I86.4%, I98.2%, K70.4%, K71.1%, K76.5%                                                                                                                                                                                                                                                                                                                                                                                                                                                                                                                                                                                                                                                                                                            |
| Cancer                  | Indicator       | Yes/No | Defined as $\geq 2$ diagnoses in the past 5 years, except non-melanoma skin cancer, benign neoplasms, cancers in situ, and neoplasms of uncertain behavior. Based on records in the <i>Inpatient</i> , <i>Outpatient</i> , and <i>Fee</i> domains.                                                                                                                                                                                                                            | ICD10: C00.%-C41.%, C43.%, C45.%, C47.%-C86.%, C88.%, C90.%-C96.%, C7A.%, C7B.0                                                                                                                                                                                                                                                                                                                                                                                                                                                                                                                                                                                                                                                                                                                          |
| Immunocompromised state | Indicator       | Yes/No | Includes ever-diagnosis of human immunodeficiency virus infection, organ or tissue transplant, bone marrow biopsy, or use of any of the following medications (prescribed $\geq 2$ times over the past year): systemic glucocorticoids, anti-inflammatory or anti-rheumatic agents in combination with glucocorticoids, immunosuppressants. Based on ICD codes, procedure codes, and medication records in the <i>Inpatient</i> , <i>Outpatient</i> , and <i>Fee</i> domains. | Organ transplant ICD9 Dx: 996.8, 996.9, E878.0, V42.0-4, V42.6-9, V43.2;<br>HIV ICD9 Dx: 042.%, 043.%, 044.%, 079.53, 795.71, V08.%;<br>Organ Transplant ICD9 Proc: 00.18, 00.91-93, 07.94, 33.5%, 33.6, 37.5, 41.0%, 41.94, 46.97, 50.5%, 52.80, 52.82-86, 55.53, 55.6%, 63.53, 65.92;<br>Organ Transplant CPT: 0585T-86T, 32851-54, 33935, 33945, 33950, 44135-7, 47135-6, 48160, 48550, 48554, 48556, 50360, 50365-6, 50370, 50380, 51580, 51585, 51597, 54680, 58240, 60510, 60512, 81595, G0341, S2052-4, S2060-1, S2065, S2102-3, S2152, T3829, T5005, T5010, T5015, T5025, T5035, T5079;<br>Immunocompromised state ICD9 Proc: 41.0%, 0.18;<br>Immunocompromised state CPT: 38205-15, 38230-2, 38240-1;<br>ICD10 Dx codes were mapped from ICD9 Dx codes using 2-way GEMS mapping table and ICD10 |

**eTable 2.** Variables Used in the Analysis when Emulating Target Trials Evaluating the Comparative Safety of the BNT162b2 and mRNA-1273 Vaccines Using Observational Data from Veterans Health Administration Electronic Health Records (January 4–October 5, 2021).

| Variable                | Functional form | Values | Detail                                                                                                                                                                                                                                                               | Codes                                                                                                                      |
|-------------------------|-----------------|--------|----------------------------------------------------------------------------------------------------------------------------------------------------------------------------------------------------------------------------------------------------------------------|----------------------------------------------------------------------------------------------------------------------------|
|                         |                 |        |                                                                                                                                                                                                                                                                      | proc codes were mapped using 1-way GEMS mapping table; Select meds from the following VA drug classes: HS051, MS190, IM600 |
| <b>Time-varying</b>     |                 |        |                                                                                                                                                                                                                                                                      |                                                                                                                            |
| BNT162b2 vaccination    | Indicator       | Yes/No | Defined using records in both the <i>Immunization</i> domain and procedures recorded in the <i>Outpatient</i> or <i>Inpatient</i> domains.                                                                                                                           | CPT: 0001A, 0002A, 91300<br>CVX: 208                                                                                       |
| mRNA-1273 vaccination   | Indicator       | Yes/No | Defined using records in both the <i>Immunization</i> domain and procedures recorded in the <i>Outpatient</i> or <i>Inpatient</i> domains.                                                                                                                           | CPT: 0011A, 0012A, 91301<br>CVX: 207                                                                                       |
| <b>Neurologic event</b> | Indicator       | Yes/No | A flag for at least one of the following conditions: Bell's palsy, non-facial paralysis, paresthesia, seizure, syncope, vertigo. Each component described below is defined as $\geq 1$ diagnosis in the <i>Inpatient</i> , <i>Outpatient</i> , or <i>Fee</i> domain. | See below                                                                                                                  |
| Bell's palsy            | Indicator       | Yes/No | N/A                                                                                                                                                                                                                                                                  | ICD9: 351.0<br>ICD10: G51.0                                                                                                |
| Non-facial paralysis    | Indicator       | Yes/No | N/A                                                                                                                                                                                                                                                                  | ICD9: 344.9, 781.4<br>ICD10: G83.9, R29.5                                                                                  |
| Paresthesia             | Indicator       | Yes/No | N/A                                                                                                                                                                                                                                                                  | ICD9: 782.0<br>ICD10: R20.%                                                                                                |
| Seizure                 | Indicator       | Yes/No | N/A                                                                                                                                                                                                                                                                  | ICD9: 345.% (not including 345.6%), 780.3, 780.39<br>ICD10: G40.% (not including G40.42, G40.B%, G40.83%), R56.9           |

**eTable 2.** Variables Used in the Analysis when Emulating Target Trials Evaluating the Comparative Safety of the BNT162b2 and mRNA-1273 Vaccines Using Observational Data from Veterans Health Administration Electronic Health Records (January 4–October 5, 2021).

| Variable                                         | Functional form | Values | Detail                                                                                                                                                                                                                       | Codes                                                                                                                                                                                     |
|--------------------------------------------------|-----------------|--------|------------------------------------------------------------------------------------------------------------------------------------------------------------------------------------------------------------------------------|-------------------------------------------------------------------------------------------------------------------------------------------------------------------------------------------|
| Syncope                                          | Indicator       | Yes/No | N/A                                                                                                                                                                                                                          | ICD9: 780.2, 992.1<br>ICD10: R55                                                                                                                                                          |
| Vertigo                                          | Indicator       | Yes/No | N/A                                                                                                                                                                                                                          | ICD9: 780.4<br>ICD10: R42                                                                                                                                                                 |
| <b>Hematologic event</b>                         | Indicator       | Yes/No | A flag for at least one of the following conditions: anemia, lymphopenia, neutropenia, thrombocytopenia. Each component described below is defined as $\geq 1$ diagnosis in the <i>Inpatient, Outpatient, or Fee</i> domain. | See below                                                                                                                                                                                 |
| Anemia                                           | Indicator       | Yes/No | N/A                                                                                                                                                                                                                          | ICD9: 280.%, 281.%, 283.%, 284.%, 285.% (not including 285.3)<br>ICD10: D50.%, D51.%, D52.%, D53.%, D59.%, D60.%, D61.% (not including D61.810), D62, D64.% (not including D64.4, D64.81) |
| Lymphocytopenia or neutropenia                   | Indicator       | Yes/No | N/A                                                                                                                                                                                                                          | ICD9: 288.0% (not including 288.01), 288.5% (not including 288.59), 289.53<br>ICD10: D70.%, D72.81% (not including D72.818), D73.81                                                       |
| Thrombocytopenia                                 | Indicator       | Yes/No | N/A                                                                                                                                                                                                                          | ICD9: 287.3[0,1,9], 287.5<br>ICD10: D69.3, D69.49, D69.6                                                                                                                                  |
| Non-traumatic intracranial hemorrhage            | Indicator       | Yes/No | Defined as $\geq 1$ diagnosis in the <i>Inpatient, Outpatient, or Fee</i> domain.                                                                                                                                            | ICD9: 431<br>ICD10: I61.%                                                                                                                                                                 |
| Ischemic or unspecified cerebrovascular accident | Indicator       | Yes/No | Defined as $\geq 1$ diagnosis in the <i>Inpatient, Outpatient, or Fee</i> domain.                                                                                                                                            | ICD9: 362.3[1,2,3], 433.[0,1,2,3,8,9]1, 434.%, 436<br>ICD10: H34.1%, H34.2%, I63.%, I66.%                                                                                                 |
| Myocardial infarction                            | Indicator       | Yes/No | Defined as $\geq 1$ diagnosis in the <i>Inpatient, Outpatient, or Fee</i> domain.                                                                                                                                            | ICD9: 410.%<br>ICD10: I21.%, I22.%                                                                                                                                                        |

**eTable 2.** Variables Used in the Analysis when Emulating Target Trials Evaluating the Comparative Safety of the BNT162b2 and mRNA-1273 Vaccines Using Observational Data from Veterans Health Administration Electronic Health Records (January 4–October 5, 2021).

| Variable                                   | Functional form | Values | Detail                                                                                                                                                                                                                                                                                                                                                                   | Codes                                                                                                                                                                                                                                             |
|--------------------------------------------|-----------------|--------|--------------------------------------------------------------------------------------------------------------------------------------------------------------------------------------------------------------------------------------------------------------------------------------------------------------------------------------------------------------------------|---------------------------------------------------------------------------------------------------------------------------------------------------------------------------------------------------------------------------------------------------|
| <b>Other thromboembolic event</b>          | Indicator       | Yes/No | A flag for at least one of the following conditions: cerebral venous sinus thrombosis, deep venous thrombosis or thrombophlebitis, pulmonary embolism, other thrombosis (arterial embolism and thrombosis, vascular insufficiency of the intestine). Each component described below is defined as $\geq 1$ diagnosis in the <i>Inpatient, Outpatient, or Fee</i> domain. | See below                                                                                                                                                                                                                                         |
| Cerebral venous sinus thrombosis           | Indicator       | Yes/No | N/A                                                                                                                                                                                                                                                                                                                                                                      | ICD9: 437.6<br>ICD10: I67.6                                                                                                                                                                                                                       |
| Deep venous thrombosis or thrombophlebitis | Indicator       | Yes/No | N/A                                                                                                                                                                                                                                                                                                                                                                      | ICD9: 451.11, 451.19, 451.81, 451.83, 452, 453.[0,2,3], 453.4%, 453.8[2,4,5,6,7], 671.[3,4]%,<br>ICD10: I80.1%, I80.2%<br>I81, I82.0, I82.1, I82.210, I82.220, I82.290, I82.3, I82.4%, I82.60%, I82.62%, I82.A1%, I82.B1%, I82.C1%, O22.3%, O87.1 |
| Pulmonary embolism                         | Indicator       | Yes/No | N/A                                                                                                                                                                                                                                                                                                                                                                      | ICD9: 415.1%, 673.2%, 673.8%<br>ICD10: I26.%, O88.2%                                                                                                                                                                                              |
| Other thrombosis                           | Indicator       | Yes/No | A composite of arterial embolism and thrombosis, vascular insufficiency of the intestine.                                                                                                                                                                                                                                                                                | ICD9: 444.%, 557.0, 557.9<br>ICD10: I74.%, K55.0%, K55.3%                                                                                                                                                                                         |
| <b>Myocarditis or pericarditis</b>         | Indicator       | Yes/No | A flag for at least one of the following conditions: myocarditis, pericarditis. Each component described below is defined as $\geq 1$ diagnosis in the                                                                                                                                                                                                                   | See below                                                                                                                                                                                                                                         |



**eTable 2.** Variables Used in the Analysis when Emulating Target Trials Evaluating the Comparative Safety of the BNT162b2 and mRNA-1273 Vaccines Using Observational Data from Veterans Health Administration Electronic Health Records (January 4–October 5, 2021).

| Variable                   | Functional form | Values | Detail                                                                                                                                                                                                                                                                                                              | Codes                                                                                                 |
|----------------------------|-----------------|--------|---------------------------------------------------------------------------------------------------------------------------------------------------------------------------------------------------------------------------------------------------------------------------------------------------------------------|-------------------------------------------------------------------------------------------------------|
|                            |                 |        | <i>Inpatient, Outpatient, or Fee</i> domain.                                                                                                                                                                                                                                                                        |                                                                                                       |
| Myocarditis                | Indicator       | Yes/No | N/A                                                                                                                                                                                                                                                                                                                 | ICD9: 391.2, 398.0, 422.%, 429.0<br>ICD10: I01.2, I09.0, I40.%, I41, I51.4                            |
| Pericarditis               | Indicator       | Yes/No | N/A                                                                                                                                                                                                                                                                                                                 | ICD9: 420.%, 423.9<br>ICD10: I30.%, I32, M32.12                                                       |
| Arrhythmia                 | Indicator       | Yes/No | Defined as ≥1 diagnosis in the <i>Inpatient, Outpatient, or Fee</i> domain.                                                                                                                                                                                                                                         | ICD9: 426.%, 427.%,<br>ICD10: I44.%, I45.%, I46.%, I47.%, I48.% (not including I48.11, I48.2%), I49.% |
| Kidney injury              | Indicator       | Yes/No | Defined as ≥1 diagnosis in the <i>Inpatient, Outpatient, or Fee</i> domain.                                                                                                                                                                                                                                         | ICD9: 584.%,<br>ICD10: N17.%                                                                          |
| Appendicitis               | Indicator       | Yes/No | Defined as ≥1 diagnosis in the <i>Inpatient, Outpatient, or Fee</i> domain.                                                                                                                                                                                                                                         | ICD9: 540.%, 541, 542<br>ICD10: K35.%, K36, K37                                                       |
| <b>Autoimmune event</b>    | Indicator       | Yes/No | A flag for at least one of the following conditions: Guillain-Barré syndrome, inflammatory bowel disease, multiple sclerosis, psoriasis, rheumatoid arthritis, systemic lupus erythematosus, uveitis. Each component described below is defined as ≥1 diagnosis in the <i>Inpatient, Outpatient, or Fee</i> domain. | See below                                                                                             |
| Guillain-Barré syndrome    | Indicator       | Yes/No | N/A                                                                                                                                                                                                                                                                                                                 | ICD9: 357.0<br>ICD10: G61.0                                                                           |
| Inflammatory bowel disease | Indicator       | Yes/No | N/A                                                                                                                                                                                                                                                                                                                 | ICD9: 555.%, 556.%, 695.2<br>ICD10: K50.%, K51.%, K59.31, L52                                         |
| Multiple sclerosis         | Indicator       | Yes/No | N/A                                                                                                                                                                                                                                                                                                                 | ICD9: 340<br>ICD10: G35                                                                               |
| Psoriasis                  | Indicator       | Yes/No | N/A                                                                                                                                                                                                                                                                                                                 | ICD9: 696.0, 696.1, 696.8                                                                             |

**eTable 2.** Variables Used in the Analysis when Emulating Target Trials Evaluating the Comparative Safety of the BNT162b2 and mRNA-1273 Vaccines Using Observational Data from Veterans Health Administration Electronic Health Records (January 4–October 5, 2021).

| Variable                     | Functional form | Values | Detail                                                                                                                                                                                            | Codes                                                                                                                                                                                                                                                                   |
|------------------------------|-----------------|--------|---------------------------------------------------------------------------------------------------------------------------------------------------------------------------------------------------|-------------------------------------------------------------------------------------------------------------------------------------------------------------------------------------------------------------------------------------------------------------------------|
|                              |                 |        |                                                                                                                                                                                                   | ICD10: L40.%, L44.8, L45                                                                                                                                                                                                                                                |
| Rheumatoid arthritis         | Indicator       | Yes/No | N/A                                                                                                                                                                                               | ICD9: 714.0, 714.1, 714.2, 714.81<br>ICD10: M05.%, M06.%                                                                                                                                                                                                                |
| Systemic lupus erythematosus | Indicator       | Yes/No | N/A                                                                                                                                                                                               | ICD9: 373.34, 695.4, 710.0<br>ICD10: H01.12%, L93.%, M32.%                                                                                                                                                                                                              |
| Uveitis                      | Indicator       | Yes/No | N/A                                                                                                                                                                                               | ICD9: 091.5%, 098.41, 115.92, 360.12, 362.18, 363.0%, 363.1% (not including 363.14), 363.2%, 364.0%, 364.1%, 364.2%, 364.3<br>ICD10: A18.53, A18.54, A51.43, A54.32, H20.%, H30.%, H32, H35.06%, H44.11%                                                                |
| <b>Herpes</b>                | Indicator       | Yes/No | A flag for at least one of the following conditions: herpes simplex, herpes zoster. Each component described below is defined as ≥1 diagnosis in the <i>Inpatient, Outpatient, or Fee</i> domain. | See below                                                                                                                                                                                                                                                               |
| Herpes simplex               | Indicator       | Yes/No | N/A                                                                                                                                                                                               | ICD9: 054.%,<br>ICD10: A60.%, B00.%                                                                                                                                                                                                                                     |
| Herpes zoster                | Indicator       | Yes/No | N/A                                                                                                                                                                                               | ICD9: 053.%,<br>ICD10: B02.%                                                                                                                                                                                                                                            |
| Arthritis or arthropathy     | Indicator       | Yes/No | Defined as ≥1 diagnosis in the <i>Inpatient, Outpatient, or Fee</i> domain.                                                                                                                       | ICD9: 713.%, 719.[0,1]%,<br>ICD10: E08.610, E09.610, E10.610, E11.610, E13.610, M02.2%, M07.6%, M12.8%, M25.0%, M25.4%, M36.1, M36.2, M36.3, M36.4                                                                                                                      |
| Pneumonia                    | Indicator       | Yes/No | Defined as ≥1 diagnosis in the <i>Inpatient, Outpatient, or Fee</i> domain.                                                                                                                       | ICD9: 480.%, 481, 482.%, 484.%, 485, 486<br>487.0, 488.01, 488.11, 488.81<br>ICD10: A37.01, A37.11, A37.81, A37.91, A48.1, B25.0, B44.0, B77.81, J09.X1, J10.00, J10.01, J10.08, J11.00, J11.08, J12.%, J13, J14, J15.%, J16.0, J16.8, J17, J18.% (not including J18.2) |

**eTable 2.** Variables Used in the Analysis when Emulating Target Trials Evaluating the Comparative Safety of the BNT162b2 and mRNA-1273 Vaccines Using Observational Data from Veterans Health Administration Electronic Health Records (January 4–October 5, 2021).

| Variable                                                                               | Functional form | Values | Detail                                                                                                                                                                                                                                                                                                                                                                                                                                                                                                                                                                                                                                                                                                                                                 | Codes |
|----------------------------------------------------------------------------------------|-----------------|--------|--------------------------------------------------------------------------------------------------------------------------------------------------------------------------------------------------------------------------------------------------------------------------------------------------------------------------------------------------------------------------------------------------------------------------------------------------------------------------------------------------------------------------------------------------------------------------------------------------------------------------------------------------------------------------------------------------------------------------------------------------------|-------|
| Documented infection with severe acute respiratory syndrome coronavirus 2 (SARS-CoV-2) | Indicator       | Yes/No | <p>Defined as a nasopharyngeal swab, nasal swab, or saliva sample (or respiratory sample, if hospitalized) positive for SARS-CoV-2.</p> <p>Identified using the VA Covid-19 National Surveillance Tool, which integrates data on laboratory tests conducted at VA clinics with natural language processing of clinical notes to capture diagnoses inside and outside the VA health care system. The algorithm to identify persons with SARS-CoV-2 infection is continually updated to ensure new annotations of Covid-19 are captured from clinical notes, with chart reviews performed periodically to validate the algorithm.<sup>1</sup> Based on records in the COVID-19 Shared Data Resource. The event date is the specimen collection date.</p> | N/A   |
| Death                                                                                  | Indicator       | Yes/No | Based on records in the <i>Patient</i> domain.                                                                                                                                                                                                                                                                                                                                                                                                                                                                                                                                                                                                                                                                                                         | N/A   |

\* Baseline variables were assessed on January 4, 2021, unless otherwise noted.

eTable 3. Baseline Characteristics of Eligible vs. Matched Vaccinated Persons

| <b>eTable 3.</b> Baseline Characteristics of Eligible vs. Matched Persons in the Target Trial Emulation Evaluating the Comparative Safety of the BNT162b2 and mRNA-1273 Vaccines, Veterans Health Administration.* |                                 |                                |
|--------------------------------------------------------------------------------------------------------------------------------------------------------------------------------------------------------------------|---------------------------------|--------------------------------|
| <b>Characteristic</b>                                                                                                                                                                                              | <b>Eligible<br/>(N=770,107)</b> | <b>Matched<br/>(N=433,672)</b> |
| Median age (IQR) – yr                                                                                                                                                                                              | 69.0 [59.0, 74.0]               | 69.0 [60.0, 74.0]              |
| Age group, no. (%)                                                                                                                                                                                                 |                                 |                                |
| 18 to 39 years                                                                                                                                                                                                     | 41,892 (5)                      | 18,670 (4)                     |
| 40 to 49 years                                                                                                                                                                                                     | 49,626 (6)                      | 24,788 (6)                     |
| 50 to 59 years                                                                                                                                                                                                     | 107,345 (14)                    | 60,764 (14)                    |
| 60 to 69 years                                                                                                                                                                                                     | 196,749 (26)                    | 115,498 (27)                   |
| 70 to 79 years                                                                                                                                                                                                     | 286,799 (37)                    | 168,754 (39)                   |
| ≥80 years                                                                                                                                                                                                          | 87,696 (11)                     | 45,198 (10)                    |
| Sex – no. (%)                                                                                                                                                                                                      |                                 |                                |
| Male                                                                                                                                                                                                               | 700,392 (91)                    | 401,816 (93)                   |
| Female                                                                                                                                                                                                             | 69,715 (9)                      | 31,856 (7)                     |
| Race – no. (%)                                                                                                                                                                                                     |                                 |                                |
| Black                                                                                                                                                                                                              | 160,758 (21)                    | 86,904 (20)                    |
| Other                                                                                                                                                                                                              | 21,367 (3)                      | 8,404 (2)                      |
| Unknown                                                                                                                                                                                                            | 29,971 (4)                      | 13,158 (3)                     |
| White                                                                                                                                                                                                              | 558,011 (72)                    | 325,206 (75)                   |
| Ethnicity – no. (%)                                                                                                                                                                                                |                                 |                                |
| Hispanic                                                                                                                                                                                                           | 59,541 (8)                      | 35,216 (8)                     |
| Not Hispanic                                                                                                                                                                                                       | 686,841 (89)                    | 386,116 (89)                   |
| Unknown                                                                                                                                                                                                            | 23,725 (3)                      | 12,340 (3)                     |
| Urban residence – no. (%)                                                                                                                                                                                          | 541,298 (70)                    | 315,910 (73)                   |
| Smoking status – no. (%)                                                                                                                                                                                           |                                 |                                |
| Current                                                                                                                                                                                                            | 261,951 (34)                    | 148,065 (34)                   |
| Former                                                                                                                                                                                                             | 240,913 (31)                    | 135,841 (31)                   |
| Never                                                                                                                                                                                                              | 267,243 (35)                    | 149,766 (35)                   |
| Coexisting conditions – no. (%)                                                                                                                                                                                    |                                 |                                |
| Chronic lung disease†                                                                                                                                                                                              | 131,533 (17)                    | 74,506 (17)                    |
| Cardiovascular disease‡                                                                                                                                                                                            | 206,137 (27)                    | 118,419 (27)                   |
| Hypertension                                                                                                                                                                                                       | 487,115 (63)                    | 278,039 (64)                   |
| Diabetes                                                                                                                                                                                                           | 266,447 (35)                    | 152,233 (35)                   |
| Chronic kidney disease                                                                                                                                                                                             | 75,703 (10)                     | 42,582 (10)                    |
| Liver disease                                                                                                                                                                                                      | 2,686 (<1)                      | 1,588 (<1)                     |
| Cancer§                                                                                                                                                                                                            | 101,418 (13)                    | 59,178 (14)                    |
| Immunocompromised state¶                                                                                                                                                                                           | 59,969 (8)                      | 34,134 (8)                     |
| Obesity                                                                                                                                                                                                            | 358,574 (47)                    | 202,092 (47)                   |

| <b>eTable 3.</b> Baseline Characteristics of Eligible vs. Matched Persons in the Target Trial Emulation Evaluating the Comparative Safety of the BNT162b2 and mRNA-1273 Vaccines, Veterans Health Administration.*                                                                                                                                 |              |              |
|----------------------------------------------------------------------------------------------------------------------------------------------------------------------------------------------------------------------------------------------------------------------------------------------------------------------------------------------------|--------------|--------------|
| No. of primary care visits in the past 5 years – no. (%)                                                                                                                                                                                                                                                                                           |              |              |
| 1-9                                                                                                                                                                                                                                                                                                                                                | 102,997 (13) | 56,145 (13)  |
| 10-19                                                                                                                                                                                                                                                                                                                                              | 255,676 (33) | 142,969 (33) |
| 20-29                                                                                                                                                                                                                                                                                                                                              | 188,628 (24) | 107,494 (25) |
| ≥30                                                                                                                                                                                                                                                                                                                                                | 222,806 (29) | 127,064 (29) |
| No. of influenza vaccinations in the past 5 years – no. (%)                                                                                                                                                                                                                                                                                        |              |              |
| 0                                                                                                                                                                                                                                                                                                                                                  | 107,985 (14) | 59,621 (14)  |
| 1 or 2                                                                                                                                                                                                                                                                                                                                             | 139,821 (18) | 77,312 (18)  |
| 3 or 4                                                                                                                                                                                                                                                                                                                                             | 241,533 (31) | 136,230 (31) |
| ≥5                                                                                                                                                                                                                                                                                                                                                 | 280,768 (36) | 160,509 (37) |
| Abbreviation: IQR, interquartile range. Percentages may not total to 100% because of rounding.                                                                                                                                                                                                                                                     |              |              |
| * Persons included in this target trial emulation received a first dose of BNT162b2 or mRNA-1273 between January 4 and September 20, 2021.                                                                                                                                                                                                         |              |              |
| † Chronic lung disease included asthma, bronchitis, and chronic obstructive pulmonary disease.                                                                                                                                                                                                                                                     |              |              |
| ‡ Cardiovascular disease included acute myocardial infarction, cardiomyopathy, cerebrovascular disease, coronary heart disease, heart failure, and peripheral vascular disease.                                                                                                                                                                    |              |              |
| § Not included here are non-melanoma skin cancer, benign neoplasms, cancers in situ, and neoplasms of uncertain behavior.                                                                                                                                                                                                                          |              |              |
| ¶ Immunocompromised state included human immunodeficiency virus infection, organ or tissue transplant, bone marrow biopsy, and use of any of the following medications (prescribed ≥2 times over the past year): systemic glucocorticoids, anti-inflammatory or anti-rheumatic agents in combination with glucocorticoids, and immunosuppressants. |              |              |
| Obesity was defined as a body-mass index (the weight in kilograms divided by the square of the height in meters) of 30 or greater.                                                                                                                                                                                                                 |              |              |

eTable 4. Baseline Characteristics of Matched Vaccinated Persons for Each Outcome-Specific Analysis

| <b>eTable 4A. Baseline Characteristics of Matched Persons in the Target Trial Emulation Evaluating the Comparative Safety of the BNT162b2 and mRNA-1273 Vaccines for Neurologic Events, Veterans Health Administration.*</b> |                                            |                                             |
|------------------------------------------------------------------------------------------------------------------------------------------------------------------------------------------------------------------------------|--------------------------------------------|---------------------------------------------|
| <b>Characteristic</b>                                                                                                                                                                                                        | <b>BNT162b2 recipients<br/>(N=116,985)</b> | <b>mRNA-1273 recipients<br/>(N=116,985)</b> |
| Median age (IQR) – yr                                                                                                                                                                                                        | 69.0 [59.0, 74.0]                          | 69.0 [59.0, 74.0]                           |
| Age group, no. (%)                                                                                                                                                                                                           |                                            |                                             |
| 18 to 39 years                                                                                                                                                                                                               | 6,193 (5)                                  | 6,193 (5)                                   |
| 40 to 49 years                                                                                                                                                                                                               | 7,153 (6)                                  | 7,153 (6)                                   |
| 50 to 59 years                                                                                                                                                                                                               | 16,651 (14)                                | 16,651 (14)                                 |
| 60 to 69 years                                                                                                                                                                                                               | 30,108 (26)                                | 30,108 (26)                                 |
| 70 to 79 years                                                                                                                                                                                                               | 44,884 (38)                                | 44,884 (38)                                 |
| ≥80 years                                                                                                                                                                                                                    | 11,996 (10)                                | 11,996 (10)                                 |
| Sex – no. (%)                                                                                                                                                                                                                |                                            |                                             |
| Male                                                                                                                                                                                                                         | 109,967 (94)                               | 109,967 (94)                                |
| Female                                                                                                                                                                                                                       | 7,018 (6)                                  | 7,018 (6)                                   |
| Race – no. (%)                                                                                                                                                                                                               |                                            |                                             |
| Black                                                                                                                                                                                                                        | 22,170 (19)                                | 22,170 (19)                                 |
| Other                                                                                                                                                                                                                        | 2,154 (2)                                  | 2,154 (2)                                   |
| Unknown                                                                                                                                                                                                                      | 3,784 (3)                                  | 3,784 (3)                                   |
| White                                                                                                                                                                                                                        | 88,877 (76)                                | 88,877 (76)                                 |
| Ethnicity – no. (%)                                                                                                                                                                                                          |                                            |                                             |
| Hispanic                                                                                                                                                                                                                     | 7,691 (7)                                  | 10,597 (9)                                  |
| Not Hispanic                                                                                                                                                                                                                 | 105,999 (91)                               | 103,016 (88)                                |
| Unknown                                                                                                                                                                                                                      | 3,295 (3)                                  | 3,372 (3)                                   |
| Urban residence – no. (%)                                                                                                                                                                                                    | 85,615 (73)                                | 85,615 (73)                                 |
| Smoking status – no. (%)                                                                                                                                                                                                     |                                            |                                             |
| Current                                                                                                                                                                                                                      | 36,581 (31)                                | 39,647 (34)                                 |
| Former                                                                                                                                                                                                                       | 38,470 (33)                                | 36,015 (31)                                 |
| Never                                                                                                                                                                                                                        | 41,934 (36)                                | 41,323 (35)                                 |
| Coexisting conditions – no. (%)                                                                                                                                                                                              |                                            |                                             |
| Chronic lung disease†                                                                                                                                                                                                        | 16,375 (14)                                | 17,852 (15)                                 |
| Cardiovascular disease‡                                                                                                                                                                                                      | 26,316 (22)                                | 26,609 (23)                                 |
| Hypertension                                                                                                                                                                                                                 | 70,301 (60)                                | 72,085 (62)                                 |
| Diabetes                                                                                                                                                                                                                     | 36,545 (31)                                | 39,982 (34)                                 |
| Chronic kidney disease                                                                                                                                                                                                       | 9,649 (8)                                  | 10,282 (9)                                  |
| Liver disease                                                                                                                                                                                                                | 356 (<1)                                   | 331 (<1)                                    |
| Cancer§                                                                                                                                                                                                                      | 14,616 (12)                                | 13,948 (12)                                 |
| Immunocompromised state¶                                                                                                                                                                                                     | 7,642 (7)                                  | 7,474 (6)                                   |
| Obesity                                                                                                                                                                                                                      | 54,378 (46)                                | 54,657 (47)                                 |

| <b>eTable 4A. Baseline Characteristics of Matched Persons in the Target Trial Emulation Evaluating the Comparative Safety of the BNT162b2 and mRNA-1273 Vaccines for Neurologic Events, Veterans Health Administration.*</b>                                                                                                                       |             |             |
|----------------------------------------------------------------------------------------------------------------------------------------------------------------------------------------------------------------------------------------------------------------------------------------------------------------------------------------------------|-------------|-------------|
| No. of primary care visits in the past 5 years – no. (%)                                                                                                                                                                                                                                                                                           |             |             |
| 1-9                                                                                                                                                                                                                                                                                                                                                | 23,798 (20) | 19,970 (17) |
| 10-19                                                                                                                                                                                                                                                                                                                                              | 45,851 (39) | 44,824 (38) |
| 20-29                                                                                                                                                                                                                                                                                                                                              | 25,997 (22) | 27,872 (24) |
| ≥30                                                                                                                                                                                                                                                                                                                                                | 21,339 (18) | 24,319 (21) |
| No. of influenza vaccinations in the past 5 years – no. (%)                                                                                                                                                                                                                                                                                        |             |             |
| 0                                                                                                                                                                                                                                                                                                                                                  | 17,073 (15) | 16,699 (14) |
| 1 or 2                                                                                                                                                                                                                                                                                                                                             | 24,214 (21) | 23,687 (20) |
| 3 or 4                                                                                                                                                                                                                                                                                                                                             | 37,901 (32) | 38,203 (33) |
| ≥5                                                                                                                                                                                                                                                                                                                                                 | 37,797 (32) | 38,396 (33) |
| Abbreviation: IQR, interquartile range. Percentages may not total to 100% because of rounding.                                                                                                                                                                                                                                                     |             |             |
| * Persons included in this target trial emulation received a first dose of BNT162b2 or mRNA-1273 between January 4 and September 20, 2021.                                                                                                                                                                                                         |             |             |
| † Chronic lung disease included asthma, bronchitis, and chronic obstructive pulmonary disease.                                                                                                                                                                                                                                                     |             |             |
| ‡ Cardiovascular disease included acute myocardial infarction, cardiomyopathy, cerebrovascular disease, coronary heart disease, heart failure, and peripheral vascular disease.                                                                                                                                                                    |             |             |
| § Not included here are non-melanoma skin cancer, benign neoplasms, cancers in situ, and neoplasms of uncertain behavior.                                                                                                                                                                                                                          |             |             |
| ¶ Immunocompromised state included human immunodeficiency virus infection, organ or tissue transplant, bone marrow biopsy, and use of any of the following medications (prescribed ≥2 times over the past year): systemic glucocorticoids, anti-inflammatory or anti-rheumatic agents in combination with glucocorticoids, and immunosuppressants. |             |             |
| Obesity was defined as a body-mass index (the weight in kilograms divided by the square of the height in meters) of 30 or greater.                                                                                                                                                                                                                 |             |             |

**eTable 4B.** Baseline Characteristics of Matched Persons in the Target Trial Emulation Evaluating the Comparative Safety of the BNT162b2 and mRNA-1273 Vaccines for Hematologic Events, Veterans Health Administration.\*

| <b>Characteristic</b>                                    | <b>BNT162b2 recipients<br/>(N=139,507)</b> | <b>mRNA-1273 recipients<br/>(N=139,507)</b> |
|----------------------------------------------------------|--------------------------------------------|---------------------------------------------|
| Median age (IQR) – yr                                    | 68.0 [58.0, 74.0]                          | 68.0 [58.0, 74.0]                           |
| Age group, no. (%)                                       |                                            |                                             |
| 18 to 39 years                                           | 7,933 (6)                                  | 7,933 (6)                                   |
| 40 to 49 years                                           | 9,790 (7)                                  | 9,790 (7)                                   |
| 50 to 59 years                                           | 21,979 (16)                                | 21,979 (16)                                 |
| 60 to 69 years                                           | 37,416 (27)                                | 37,416 (27)                                 |
| 70 to 79 years                                           | 50,884 (36)                                | 50,884 (36)                                 |
| ≥80 years                                                | 11,505 (8)                                 | 11,505 (8)                                  |
| Sex – no. (%)                                            |                                            |                                             |
| Male                                                     | 130,415 (93)                               | 130,415 (93)                                |
| Female                                                   | 9,092 (7)                                  | 9,092 (7)                                   |
| Race – no. (%)                                           |                                            |                                             |
| Black                                                    | 24,258 (17)                                | 24,258 (17)                                 |
| Other                                                    | 2,784 (2)                                  | 2,784 (2)                                   |
| Unknown                                                  | 4,352 (3)                                  | 4,352 (3)                                   |
| White                                                    | 108,113 (77)                               | 108,113 (77)                                |
| Ethnicity – no. (%)                                      |                                            |                                             |
| Hispanic                                                 | 9,821 (7)                                  | 13,296 (10)                                 |
| Not Hispanic                                             | 125,740 (90)                               | 122,305 (88)                                |
| Unknown                                                  | 3,946 (3)                                  | 3,906 (3)                                   |
| Urban residence – no. (%)                                | 100,658 (72)                               | 100,658 (72)                                |
| Smoking status – no. (%)                                 |                                            |                                             |
| Current                                                  | 46,344 (33)                                | 50,323 (36)                                 |
| Former                                                   | 44,330 (32)                                | 41,226 (30)                                 |
| Never                                                    | 48,833 (35)                                | 47,958 (34)                                 |
| Coexisting conditions – no. (%)                          |                                            |                                             |
| Chronic lung disease†                                    | 20,002 (14)                                | 22,226 (16)                                 |
| Cardiovascular disease‡                                  | 31,127 (22)                                | 31,537 (23)                                 |
| Hypertension                                             | 81,727 (59)                                | 84,721 (61)                                 |
| Diabetes                                                 | 41,647 (30)                                | 46,276 (33)                                 |
| Chronic kidney disease                                   | 7,899 (6)                                  | 8,565 (6)                                   |
| Liver disease                                            | 149 (<1)                                   | 118 (<1)                                    |
| Cancer§                                                  | 15,180 (11)                                | 14,275 (10)                                 |
| Immunocompromised state¶                                 | 8,007 (6)                                  | 7,819 (6)                                   |
| Obesity                                                  | 67,125 (48)                                | 67,840 (49)                                 |
| No. of primary care visits in the past 5 years – no. (%) |                                            |                                             |



| <b>eTable 4B.</b> Baseline Characteristics of Matched Persons in the Target Trial Emulation Evaluating the Comparative Safety of the BNT162b2 and mRNA-1273 Vaccines for Hematologic Events, Veterans Health Administration.*                                                                                                                      |             |             |
|----------------------------------------------------------------------------------------------------------------------------------------------------------------------------------------------------------------------------------------------------------------------------------------------------------------------------------------------------|-------------|-------------|
| 1-9                                                                                                                                                                                                                                                                                                                                                | 25,381 (18) | 20,638 (15) |
| 10-19                                                                                                                                                                                                                                                                                                                                              | 52,283 (37) | 50,669 (36) |
| 20-29                                                                                                                                                                                                                                                                                                                                              | 32,811 (24) | 34,808 (25) |
| ≥30                                                                                                                                                                                                                                                                                                                                                | 29,032 (21) | 33,392 (24) |
| No. of influenza vaccinations in the past 5 years – no. (%)                                                                                                                                                                                                                                                                                        |             |             |
| 0                                                                                                                                                                                                                                                                                                                                                  | 20,651 (15) | 20,525 (15) |
| 1 or 2                                                                                                                                                                                                                                                                                                                                             | 28,485 (20) | 27,542 (20) |
| 3 or 4                                                                                                                                                                                                                                                                                                                                             | 44,990 (32) | 44,881 (32) |
| ≥5                                                                                                                                                                                                                                                                                                                                                 | 45,381 (33) | 46,559 (33) |
| Abbreviation: IQR, interquartile range. Percentages may not total to 100% because of rounding.                                                                                                                                                                                                                                                     |             |             |
| * Persons included in this target trial emulation received a first dose of BNT162b2 or mRNA-1273 between January 4 and September 20, 2021.                                                                                                                                                                                                         |             |             |
| † Chronic lung disease included asthma, bronchitis, and chronic obstructive pulmonary disease.                                                                                                                                                                                                                                                     |             |             |
| ‡ Cardiovascular disease included acute myocardial infarction, cardiomyopathy, cerebrovascular disease, coronary heart disease, heart failure, and peripheral vascular disease.                                                                                                                                                                    |             |             |
| § Not included here are non-melanoma skin cancer, benign neoplasms, cancers in situ, and neoplasms of uncertain behavior.                                                                                                                                                                                                                          |             |             |
| ¶ Immunocompromised state included human immunodeficiency virus infection, organ or tissue transplant, bone marrow biopsy, and use of any of the following medications (prescribed ≥2 times over the past year): systemic glucocorticoids, anti-inflammatory or anti-rheumatic agents in combination with glucocorticoids, and immunosuppressants. |             |             |
| Obesity was defined as a body-mass index (the weight in kilograms divided by the square of the height in meters) of 30 or greater.                                                                                                                                                                                                                 |             |             |

**eTable 4C.** Baseline Characteristics of Matched Persons in the Target Trial Emulation Evaluating the Comparative Safety of the BNT162b2 and mRNA-1273 Vaccines for Hemorrhagic Stroke, Veterans Health Administration.\*

| <b>Characteristic</b>                                    | <b>BNT162b2 recipients<br/>(N=215,754)</b> | <b>mRNA-1273 recipients<br/>(N=215,754)</b> |
|----------------------------------------------------------|--------------------------------------------|---------------------------------------------|
| Median age (IQR) – yr                                    | 69.0 [60.0, 74.0]                          | 69.0 [60.0, 74.0]                           |
| Age group, no. (%)                                       |                                            |                                             |
| 18 to 39 years                                           | 9,319 (4)                                  | 9,319 (4)                                   |
| 40 to 49 years                                           | 12,370 (6)                                 | 12,370 (6)                                  |
| 50 to 59 years                                           | 30,251 (14)                                | 30,251 (14)                                 |
| 60 to 69 years                                           | 57,426 (27)                                | 57,426 (27)                                 |
| 70 to 79 years                                           | 83,914 (39)                                | 83,914 (39)                                 |
| ≥80 years                                                | 22,474 (10)                                | 22,474 (10)                                 |
| Sex – no. (%)                                            |                                            |                                             |
| Male                                                     | 199,899 (93)                               | 199,899 (93)                                |
| Female                                                   | 15,855 (7)                                 | 15,855 (7)                                  |
| Race – no. (%)                                           |                                            |                                             |
| Black                                                    | 43,178 (20)                                | 43,178 (20)                                 |
| Other                                                    | 4,173 (2)                                  | 4,173 (2)                                   |
| Unknown                                                  | 6,551 (3)                                  | 6,551 (3)                                   |
| White                                                    | 161,852 (75)                               | 161,852 (75)                                |
| Ethnicity – no. (%)                                      |                                            |                                             |
| Hispanic                                                 | 14,769 (7)                                 | 20,335 (9)                                  |
| Not Hispanic                                             | 194,797 (90)                               | 189,276 (88)                                |
| Unknown                                                  | 6,188 (3)                                  | 6,143 (3)                                   |
| Urban residence – no. (%)                                | 157,116 (73)                               | 157,116 (73)                                |
| Smoking status – no. (%)                                 |                                            |                                             |
| Current                                                  | 70,739 (33)                                | 76,282 (35)                                 |
| Former                                                   | 69,633 (32)                                | 65,595 (30)                                 |
| Never                                                    | 75,382 (35)                                | 73,877 (34)                                 |
| Coexisting conditions – no. (%)                          |                                            |                                             |
| Chronic lung disease†                                    | 35,461 (16)                                | 38,652 (18)                                 |
| Cardiovascular disease‡                                  | 58,371 (27)                                | 58,414 (27)                                 |
| Hypertension                                             | 136,366 (63)                               | 139,744 (65)                                |
| Diabetes                                                 | 72,427 (34)                                | 78,573 (36)                                 |
| Chronic kidney disease                                   | 20,647 (10)                                | 21,655 (10)                                 |
| Liver disease                                            | 805 (<1)                                   | 762 (<1)                                    |
| Cancer§                                                  | 30,091 (14)                                | 28,491 (13)                                 |
| Immunocompromised state¶                                 | 17,205 (8)                                 | 16,771 (8)                                  |
| Obesity                                                  | 100,228 (46)                               | 100,892 (47)                                |
| No. of primary care visits in the past 5 years – no. (%) |                                            |                                             |

| <b>eTable 4C.</b> Baseline Characteristics of Matched Persons in the Target Trial Emulation Evaluating the Comparative Safety of the BNT162b2 and mRNA-1273 Vaccines for Hemorrhagic Stroke, Veterans Health Administration.*                                                                                                                      |             |             |
|----------------------------------------------------------------------------------------------------------------------------------------------------------------------------------------------------------------------------------------------------------------------------------------------------------------------------------------------------|-------------|-------------|
| 1-9                                                                                                                                                                                                                                                                                                                                                | 30,901 (14) | 25,338 (12) |
| 10-19                                                                                                                                                                                                                                                                                                                                              | 72,273 (33) | 70,139 (33) |
| 20-29                                                                                                                                                                                                                                                                                                                                              | 52,378 (24) | 54,574 (25) |
| ≥30                                                                                                                                                                                                                                                                                                                                                | 60,202 (28) | 65,703 (30) |
| No. of influenza vaccinations in the past 5 years – no. (%)                                                                                                                                                                                                                                                                                        |             |             |
| 0                                                                                                                                                                                                                                                                                                                                                  | 29,678 (14) | 29,454 (14) |
| 1 or 2                                                                                                                                                                                                                                                                                                                                             | 38,947 (18) | 37,925 (18) |
| 3 or 4                                                                                                                                                                                                                                                                                                                                             | 67,893 (31) | 68,029 (32) |
| ≥5                                                                                                                                                                                                                                                                                                                                                 | 79,236 (37) | 80,346 (37) |
| Abbreviation: IQR, interquartile range. Percentages may not total to 100% because of rounding.                                                                                                                                                                                                                                                     |             |             |
| * Persons included in this target trial emulation received a first dose of BNT162b2 or mRNA-1273 between January 4 and September 20, 2021.                                                                                                                                                                                                         |             |             |
| † Chronic lung disease included asthma, bronchitis, and chronic obstructive pulmonary disease.                                                                                                                                                                                                                                                     |             |             |
| ‡ Cardiovascular disease included acute myocardial infarction, cardiomyopathy, cerebrovascular disease, coronary heart disease, heart failure, and peripheral vascular disease.                                                                                                                                                                    |             |             |
| § Not included here are non-melanoma skin cancer, benign neoplasms, cancers in situ, and neoplasms of uncertain behavior.                                                                                                                                                                                                                          |             |             |
| ¶ Immunocompromised state included human immunodeficiency virus infection, organ or tissue transplant, bone marrow biopsy, and use of any of the following medications (prescribed ≥2 times over the past year): systemic glucocorticoids, anti-inflammatory or anti-rheumatic agents in combination with glucocorticoids, and immunosuppressants. |             |             |
| Obesity was defined as a body-mass index (the weight in kilograms divided by the square of the height in meters) of 30 or greater.                                                                                                                                                                                                                 |             |             |

**eTable 4D.** Baseline Characteristics of Matched Persons in the Target Trial Emulation Evaluating the Comparative Safety of the BNT162b2 and mRNA-1273 Vaccines for Ischemic Stroke, Veterans Health Administration.\*

| <b>Characteristic</b>                                    | <b>BNT162b2 recipients<br/>(N=196,131)</b> | <b>mRNA-1273 recipients<br/>(N=196,131)</b> |
|----------------------------------------------------------|--------------------------------------------|---------------------------------------------|
| Median age (IQR) – yr                                    | 69.0 [59.0, 74.0]                          | 69.0 [59.0, 74.0]                           |
| Age group, no. (%)                                       |                                            |                                             |
| 18 to 39 years                                           | 9,229 (5)                                  | 9,229 (5)                                   |
| 40 to 49 years                                           | 12,082 (6)                                 | 12,082 (6)                                  |
| 50 to 59 years                                           | 28,780 (15)                                | 28,780 (15)                                 |
| 60 to 69 years                                           | 52,214 (27)                                | 52,214 (27)                                 |
| 70 to 79 years                                           | 74,479 (38)                                | 74,479 (38)                                 |
| ≥80 years                                                | 19,347 (10)                                | 19,347 (10)                                 |
| Sex – no. (%)                                            |                                            |                                             |
| Male                                                     | 181,185 (92)                               | 181,185 (92)                                |
| Female                                                   | 14,946 (8)                                 | 14,946 (8)                                  |
| Race – no. (%)                                           |                                            |                                             |
| Black                                                    | 39,030 (20)                                | 39,030 (20)                                 |
| Other                                                    | 3,802 (2)                                  | 3,802 (2)                                   |
| Unknown                                                  | 6,018 (3)                                  | 6,018 (3)                                   |
| White                                                    | 147,281 (75)                               | 147,281 (75)                                |
| Ethnicity – no. (%)                                      |                                            |                                             |
| Hispanic                                                 | 13,566 (7)                                 | 18,696 (10)                                 |
| Not Hispanic                                             | 177,029 (90)                               | 171,830 (88)                                |
| Unknown                                                  | 5,536 (3)                                  | 5,605 (3)                                   |
| Urban residence – no. (%)                                | 142,988 (73)                               | 142,988 (73)                                |
| Smoking status – no. (%)                                 |                                            |                                             |
| Current                                                  | 63,303 (32)                                | 68,597 (35)                                 |
| Former                                                   | 63,145 (32)                                | 59,266 (30)                                 |
| Never                                                    | 69,683 (36)                                | 68,268 (35)                                 |
| Coexisting conditions – no. (%)                          |                                            |                                             |
| Chronic lung disease†                                    | 30,863 (16)                                | 33,819 (17)                                 |
| Cardiovascular disease‡                                  | 45,944 (23)                                | 46,552 (24)                                 |
| Hypertension                                             | 120,565 (61)                               | 124,140 (63)                                |
| Diabetes                                                 | 63,476 (32)                                | 69,154 (35)                                 |
| Chronic kidney disease                                   | 17,279 (9)                                 | 18,147 (9)                                  |
| Liver disease                                            | 714 (<1)                                   | 678 (<1)                                    |
| Cancer§                                                  | 26,637 (14)                                | 25,245 (13)                                 |
| Immunocompromised state¶                                 | 15,039 (8)                                 | 14,615 (7)                                  |
| Obesity                                                  | 92,080 (47)                                | 92,509 (47)                                 |
| No. of primary care visits in the past 5 years – no. (%) |                                            |                                             |

| <b>eTable 4D. Baseline Characteristics of Matched Persons in the Target Trial Emulation Evaluating the Comparative Safety of the BNT162b2 and mRNA-1273 Vaccines for Ischemic Stroke, Veterans Health Administration.*</b>                                                                                                                         |             |             |
|----------------------------------------------------------------------------------------------------------------------------------------------------------------------------------------------------------------------------------------------------------------------------------------------------------------------------------------------------|-------------|-------------|
| 1-9                                                                                                                                                                                                                                                                                                                                                | 29,708 (15) | 24,335 (12) |
| 10-19                                                                                                                                                                                                                                                                                                                                              | 67,939 (35) | 65,812 (34) |
| 20-29                                                                                                                                                                                                                                                                                                                                              | 47,416 (24) | 49,683 (25) |
| ≥30                                                                                                                                                                                                                                                                                                                                                | 51,068 (26) | 56,301 (29) |
| No. of influenza vaccinations in the past 5 years – no. (%)                                                                                                                                                                                                                                                                                        |             |             |
| 0                                                                                                                                                                                                                                                                                                                                                  | 27,501 (14) | 27,412 (14) |
| 1 or 2                                                                                                                                                                                                                                                                                                                                             | 36,445 (19) | 35,408 (18) |
| 3 or 4                                                                                                                                                                                                                                                                                                                                             | 61,796 (32) | 61,853 (32) |
| ≥5                                                                                                                                                                                                                                                                                                                                                 | 70,389 (36) | 71,458 (36) |
| Abbreviation: IQR, interquartile range. Percentages may not total to 100% because of rounding.                                                                                                                                                                                                                                                     |             |             |
| * Persons included in this target trial emulation received a first dose of BNT162b2 or mRNA-1273 between January 4 and September 20, 2021.                                                                                                                                                                                                         |             |             |
| † Chronic lung disease included asthma, bronchitis, and chronic obstructive pulmonary disease.                                                                                                                                                                                                                                                     |             |             |
| ‡ Cardiovascular disease included acute myocardial infarction, cardiomyopathy, cerebrovascular disease, coronary heart disease, heart failure, and peripheral vascular disease.                                                                                                                                                                    |             |             |
| § Not included here are non-melanoma skin cancer, benign neoplasms, cancers in situ, and neoplasms of uncertain behavior.                                                                                                                                                                                                                          |             |             |
| ¶ Immunocompromised state included human immunodeficiency virus infection, organ or tissue transplant, bone marrow biopsy, and use of any of the following medications (prescribed ≥2 times over the past year): systemic glucocorticoids, anti-inflammatory or anti-rheumatic agents in combination with glucocorticoids, and immunosuppressants. |             |             |
| Obesity was defined as a body-mass index (the weight in kilograms divided by the square of the height in meters) of 30 or greater.                                                                                                                                                                                                                 |             |             |

**eTable 4E.** Baseline Characteristics of Matched Persons in the Target Trial Emulation Evaluating the Comparative Safety of the BNT162b2 and mRNA-1273 Vaccines for Myocardial Infarction, Veterans Health Administration.\*

| <b>Characteristic</b>                                    | <b>BNT162b2 recipients<br/>(N=203,068)</b> | <b>mRNA-1273 recipients<br/>(N=203,068)</b> |
|----------------------------------------------------------|--------------------------------------------|---------------------------------------------|
| Median age (IQR) – yr                                    | 69.0 [60.0, 74.0]                          | 69.0 [60.0, 74.0]                           |
| Age group, no. (%)                                       |                                            |                                             |
| 18 to 39 years                                           | 9,293 (5)                                  | 9,293 (5)                                   |
| 40 to 49 years                                           | 12,218 (6)                                 | 12,218 (6)                                  |
| 50 to 59 years                                           | 29,236 (14)                                | 29,236 (14)                                 |
| 60 to 69 years                                           | 53,819 (27)                                | 53,819 (27)                                 |
| 70 to 79 years                                           | 77,569 (38)                                | 77,569 (38)                                 |
| ≥80 years                                                | 20,933 (10)                                | 20,933 (10)                                 |
| Sex – no. (%)                                            |                                            |                                             |
| Male                                                     | 187,532 (92)                               | 187,532 (92)                                |
| Female                                                   | 15,536 (8)                                 | 15,536 (8)                                  |
| Race – no. (%)                                           |                                            |                                             |
| Black                                                    | 41,122 (20)                                | 41,122 (20)                                 |
| Other                                                    | 3,956 (2)                                  | 3,956 (2)                                   |
| Unknown                                                  | 6,214 (3)                                  | 6,214 (3)                                   |
| White                                                    | 151,776 (75)                               | 151,776 (75)                                |
| Ethnicity – no. (%)                                      |                                            |                                             |
| Hispanic                                                 | 13,963 (7)                                 | 19,321 (10)                                 |
| Not Hispanic                                             | 183,325 (90)                               | 177,961 (88)                                |
| Unknown                                                  | 5,780 (3)                                  | 5,786 (3)                                   |
| Urban residence – no. (%)                                | 148,444 (73)                               | 148,444 (73)                                |
| Smoking status – no. (%)                                 |                                            |                                             |
| Current                                                  | 65,475 (32)                                | 70,749 (35)                                 |
| Former                                                   | 65,365 (32)                                | 61,619 (30)                                 |
| Never                                                    | 72,228 (36)                                | 70,700 (35)                                 |
| Coexisting conditions – no. (%)                          |                                            |                                             |
| Chronic lung disease†                                    | 31,934 (16)                                | 34,996 (17)                                 |
| Cardiovascular disease‡                                  | 48,002 (24)                                | 48,302 (24)                                 |
| Hypertension                                             | 125,887 (62)                               | 129,183 (64)                                |
| Diabetes                                                 | 66,256 (33)                                | 72,389 (36)                                 |
| Chronic kidney disease                                   | 17,912 (9)                                 | 19,154 (9)                                  |
| Liver disease                                            | 757 (<1)                                   | 712 (<1)                                    |
| Cancer§                                                  | 27,846 (14)                                | 26,376 (13)                                 |
| Immunocompromised state¶                                 | 15,698 (8)                                 | 14,901 (7)                                  |
| Obesity                                                  | 94,761 (47)                                | 95,331 (47)                                 |
| No. of primary care visits in the past 5 years – no. (%) |                                            |                                             |

| <b>eTable 4E.</b> Baseline Characteristics of Matched Persons in the Target Trial Emulation Evaluating the Comparative Safety of the BNT162b2 and mRNA-1273 Vaccines for Myocardial Infarction, Veterans Health Administration.*                                                                                                                   |             |             |
|----------------------------------------------------------------------------------------------------------------------------------------------------------------------------------------------------------------------------------------------------------------------------------------------------------------------------------------------------|-------------|-------------|
| 1-9                                                                                                                                                                                                                                                                                                                                                | 30,419 (15) | 24,840 (12) |
| 10-19                                                                                                                                                                                                                                                                                                                                              | 69,735 (34) | 67,366 (33) |
| 20-29                                                                                                                                                                                                                                                                                                                                              | 49,159 (24) | 51,562 (25) |
| ≥30                                                                                                                                                                                                                                                                                                                                                | 53,755 (26) | 59,300 (29) |
| No. of influenza vaccinations in the past 5 years – no. (%)                                                                                                                                                                                                                                                                                        |             |             |
| 0                                                                                                                                                                                                                                                                                                                                                  | 28,213 (14) | 27,982 (14) |
| 1 or 2                                                                                                                                                                                                                                                                                                                                             | 37,340 (18) | 36,404 (18) |
| 3 or 4                                                                                                                                                                                                                                                                                                                                             | 64,389 (32) | 64,278 (32) |
| ≥5                                                                                                                                                                                                                                                                                                                                                 | 73,126 (36) | 74,404 (37) |
| Abbreviation: IQR, interquartile range. Percentages may not total to 100% because of rounding.                                                                                                                                                                                                                                                     |             |             |
| * Persons included in this target trial emulation received a first dose of BNT162b2 or mRNA-1273 between January 4 and September 20, 2021.                                                                                                                                                                                                         |             |             |
| † Chronic lung disease included asthma, bronchitis, and chronic obstructive pulmonary disease.                                                                                                                                                                                                                                                     |             |             |
| ‡ Cardiovascular disease included acute myocardial infarction, cardiomyopathy, cerebrovascular disease, coronary heart disease, heart failure, and peripheral vascular disease.                                                                                                                                                                    |             |             |
| § Not included here are non-melanoma skin cancer, benign neoplasms, cancers in situ, and neoplasms of uncertain behavior.                                                                                                                                                                                                                          |             |             |
| ¶ Immunocompromised state included human immunodeficiency virus infection, organ or tissue transplant, bone marrow biopsy, and use of any of the following medications (prescribed ≥2 times over the past year): systemic glucocorticoids, anti-inflammatory or anti-rheumatic agents in combination with glucocorticoids, and immunosuppressants. |             |             |
| Obesity was defined as a body-mass index (the weight in kilograms divided by the square of the height in meters) of 30 or greater.                                                                                                                                                                                                                 |             |             |

**eTable 4F.** Baseline Characteristics of Matched Persons in the Target Trial Emulation Evaluating the Comparative Safety of the BNT162b2 and mRNA-1273 Vaccines for Other Thromboembolic Events, Veterans Health Administration.\*

| <b>Characteristic</b>                                    | <b>BNT162b2 recipients<br/>(N=201,063)</b> | <b>mRNA-1273 recipients<br/>(N=201,063)</b> |
|----------------------------------------------------------|--------------------------------------------|---------------------------------------------|
| Median age (IQR) – yr                                    | 69.0 [60.0, 74.0]                          | 69.0 [60.0, 74.0]                           |
| Age group, no. (%)                                       |                                            |                                             |
| 18 to 39 years                                           | 9,156 (5)                                  | 9,156 (5)                                   |
| 40 to 49 years                                           | 11,966 (6)                                 | 11,966 (6)                                  |
| 50 to 59 years                                           | 28,782 (14)                                | 28,782 (14)                                 |
| 60 to 69 years                                           | 53,330 (27)                                | 53,330 (27)                                 |
| 70 to 79 years                                           | 77,176 (38)                                | 77,176 (38)                                 |
| ≥80 years                                                | 20,653 (10)                                | 20,653 (10)                                 |
| Sex – no. (%)                                            |                                            |                                             |
| Male                                                     | 186,003 (93)                               | 186,003 (93)                                |
| Female                                                   | 15,060 (7)                                 | 15,060 (7)                                  |
| Race – no. (%)                                           |                                            |                                             |
| Black                                                    | 40,293 (20)                                | 40,293 (20)                                 |
| Other                                                    | 3,958 (2)                                  | 3,958 (2)                                   |
| Unknown                                                  | 6,156 (3)                                  | 6,156 (3)                                   |
| White                                                    | 150,656 (75)                               | 150,656 (75)                                |
| Ethnicity – no. (%)                                      |                                            |                                             |
| Hispanic                                                 | 14,007 (7)                                 | 19,261 (10)                                 |
| Not Hispanic                                             | 181,411 (90)                               | 176,076 (88)                                |
| Unknown                                                  | 5,645 (3)                                  | 5,726 (3)                                   |
| Urban residence – no. (%)                                | 146,617 (73)                               | 146,617 (73)                                |
| Smoking status – no. (%)                                 |                                            |                                             |
| Current                                                  | 65,054 (32)                                | 70,421 (35)                                 |
| Former                                                   | 64,794 (32)                                | 61,002 (30)                                 |
| Never                                                    | 71,215 (35)                                | 69,640 (35)                                 |
| Coexisting conditions – no. (%)                          |                                            |                                             |
| Chronic lung disease†                                    | 31,590 (16)                                | 34,576 (17)                                 |
| Cardiovascular disease‡                                  | 51,723 (26)                                | 51,601 (26)                                 |
| Hypertension                                             | 125,897 (63)                               | 128,995 (64)                                |
| Diabetes                                                 | 66,571 (33)                                | 72,151 (36)                                 |
| Chronic kidney disease                                   | 18,121 (9)                                 | 19,010 (9)                                  |
| Liver disease                                            | 642 (<1)                                   | 597 (<1)                                    |
| Cancer§                                                  | 26,891 (13)                                | 25,453 (13)                                 |
| Immunocompromised state¶                                 | 15,236 (8)                                 | 14,583 (7)                                  |
| Obesity                                                  | 93,261 (46)                                | 93,818 (47)                                 |
| No. of primary care visits in the past 5 years – no. (%) |                                            |                                             |



| <b>eTable 4F. Baseline Characteristics of Matched Persons in the Target Trial Emulation Evaluating the Comparative Safety of the BNT162b2 and mRNA-1273 Vaccines for Other Thromboembolic Events, Veterans Health Administration.*</b>                                                                                                             |             |             |
|----------------------------------------------------------------------------------------------------------------------------------------------------------------------------------------------------------------------------------------------------------------------------------------------------------------------------------------------------|-------------|-------------|
| 1-9                                                                                                                                                                                                                                                                                                                                                | 30,032 (15) | 24,763 (12) |
| 10-19                                                                                                                                                                                                                                                                                                                                              | 69,641 (35) | 67,103 (33) |
| 20-29                                                                                                                                                                                                                                                                                                                                              | 48,859 (24) | 51,075 (25) |
| ≥30                                                                                                                                                                                                                                                                                                                                                | 52,531 (26) | 58,122 (29) |
| No. of influenza vaccinations in the past 5 years – no. (%)                                                                                                                                                                                                                                                                                        |             |             |
| 0                                                                                                                                                                                                                                                                                                                                                  | 28,029 (14) | 27,807 (14) |
| 1 or 2                                                                                                                                                                                                                                                                                                                                             | 37,120 (18) | 35,985 (18) |
| 3 or 4                                                                                                                                                                                                                                                                                                                                             | 63,612 (32) | 63,741 (32) |
| ≥5                                                                                                                                                                                                                                                                                                                                                 | 72,302 (36) | 73,530 (37) |
| Abbreviation: IQR, interquartile range. Percentages may not total to 100% because of rounding.                                                                                                                                                                                                                                                     |             |             |
| * Persons included in this target trial emulation received a first dose of BNT162b2 or mRNA-1273 between January 4 and September 20, 2021.                                                                                                                                                                                                         |             |             |
| † Chronic lung disease included asthma, bronchitis, and chronic obstructive pulmonary disease.                                                                                                                                                                                                                                                     |             |             |
| ‡ Cardiovascular disease included acute myocardial infarction, cardiomyopathy, cerebrovascular disease, coronary heart disease, heart failure, and peripheral vascular disease.                                                                                                                                                                    |             |             |
| § Not included here are non-melanoma skin cancer, benign neoplasms, cancers in situ, and neoplasms of uncertain behavior.                                                                                                                                                                                                                          |             |             |
| ¶ Immunocompromised state included human immunodeficiency virus infection, organ or tissue transplant, bone marrow biopsy, and use of any of the following medications (prescribed ≥2 times over the past year): systemic glucocorticoids, anti-inflammatory or anti-rheumatic agents in combination with glucocorticoids, and immunosuppressants. |             |             |
| Obesity was defined as a body-mass index (the weight in kilograms divided by the square of the height in meters) of 30 or greater.                                                                                                                                                                                                                 |             |             |

**eTable 4G.** Baseline Characteristics of Matched Persons in the Target Trial Emulation Evaluating the Comparative Safety of the BNT162b2 and mRNA-1273 Vaccines for Myocarditis or Pericarditis, Veterans Health Administration.\*

| <b>Characteristic</b>                                    | <b>BNT162b2 recipients<br/>(N=214,782)</b> | <b>mRNA-1273 recipients<br/>(N=214,782)</b> |
|----------------------------------------------------------|--------------------------------------------|---------------------------------------------|
| Median age (IQR) – yr                                    | 69.0 [60.0, 74.0]                          | 69.0 [60.0, 74.0]                           |
| Age group, no. (%)                                       |                                            |                                             |
| 18 to 39 years                                           | 9,287 (4)                                  | 9,287 (4)                                   |
| 40 to 49 years                                           | 12,294 (6)                                 | 12,294 (6)                                  |
| 50 to 59 years                                           | 30,155 (14)                                | 30,155 (14)                                 |
| 60 to 69 years                                           | 57,173 (27)                                | 57,173 (27)                                 |
| 70 to 79 years                                           | 83,527 (39)                                | 83,527 (39)                                 |
| ≥80 years                                                | 22,346 (10)                                | 22,346 (10)                                 |
| Sex – no. (%)                                            |                                            |                                             |
| Male                                                     | 199,005 (93)                               | 199,005 (93)                                |
| Female                                                   | 15,777 (7)                                 | 15,777 (7)                                  |
| Race – no. (%)                                           |                                            |                                             |
| Black                                                    | 43,017 (20)                                | 43,017 (20)                                 |
| Other                                                    | 4,165 (2)                                  | 4,165 (2)                                   |
| Unknown                                                  | 6,532 (3)                                  | 6,532 (3)                                   |
| White                                                    | 161,068 (75)                               | 161,068 (75)                                |
| Ethnicity – no. (%)                                      |                                            |                                             |
| Hispanic                                                 | 14,704 (7)                                 | 20,355 (9)                                  |
| Not Hispanic                                             | 194,034 (90)                               | 188,336 (88)                                |
| Unknown                                                  | 6,044 (3)                                  | 6,091 (3)                                   |
| Urban residence – no. (%)                                | 156,455 (73)                               | 156,455 (73)                                |
| Smoking status – no. (%)                                 |                                            |                                             |
| Current                                                  | 70,434 (33)                                | 76,175 (35)                                 |
| Former                                                   | 69,351 (32)                                | 65,217 (30)                                 |
| Never                                                    | 74,997 (35)                                | 73,390 (34)                                 |
| Coexisting conditions – no. (%)                          |                                            |                                             |
| Chronic lung disease†                                    | 35,077 (16)                                | 38,380 (18)                                 |
| Cardiovascular disease‡                                  | 58,290 (27)                                | 58,112 (27)                                 |
| Hypertension                                             | 135,717 (63)                               | 139,201 (65)                                |
| Diabetes                                                 | 71,960 (34)                                | 78,422 (37)                                 |
| Chronic kidney disease                                   | 20,385 (9)                                 | 21,451 (10)                                 |
| Liver disease                                            | 810 (<1)                                   | 758 (<1)                                    |
| Cancer§                                                  | 30,003 (14)                                | 28,219 (13)                                 |
| Immunocompromised state¶                                 | 17,019 (8)                                 | 16,405 (8)                                  |
| Obesity                                                  | 99,768 (46)                                | 100,288 (47)                                |
| No. of primary care visits in the past 5 years – no. (%) |                                            |                                             |

**eTable 4G.** Baseline Characteristics of Matched Persons in the Target Trial Emulation Evaluating the Comparative Safety of the BNT162b2 and mRNA-1273 Vaccines for Myocarditis or Pericarditis, Veterans Health Administration.\*

|                                                                                                                                                                                                                                                                                                                                                    |             |             |
|----------------------------------------------------------------------------------------------------------------------------------------------------------------------------------------------------------------------------------------------------------------------------------------------------------------------------------------------------|-------------|-------------|
| 1-9                                                                                                                                                                                                                                                                                                                                                | 30,721 (14) | 25,303 (12) |
| 10-19                                                                                                                                                                                                                                                                                                                                              | 72,263 (34) | 69,929 (33) |
| 20-29                                                                                                                                                                                                                                                                                                                                              | 52,100 (24) | 54,235 (25) |
| ≥30                                                                                                                                                                                                                                                                                                                                                | 59,698 (28) | 65,315 (30) |
| No. of influenza vaccinations in the past 5 years – no. (%)                                                                                                                                                                                                                                                                                        |             |             |
| 0                                                                                                                                                                                                                                                                                                                                                  | 29,640 (14) | 29,553 (14) |
| 1 or 2                                                                                                                                                                                                                                                                                                                                             | 38,900 (18) | 37,973 (18) |
| 3 or 4                                                                                                                                                                                                                                                                                                                                             | 67,713 (32) | 67,642 (31) |
| ≥5                                                                                                                                                                                                                                                                                                                                                 | 78,529 (37) | 79,614 (37) |
| Abbreviation: IQR, interquartile range. Percentages may not total to 100% because of rounding.                                                                                                                                                                                                                                                     |             |             |
| * Persons included in this target trial emulation received a first dose of BNT162b2 or mRNA-1273 between January 4 and September 20, 2021.                                                                                                                                                                                                         |             |             |
| † Chronic lung disease included asthma, bronchitis, and chronic obstructive pulmonary disease.                                                                                                                                                                                                                                                     |             |             |
| ‡ Cardiovascular disease included acute myocardial infarction, cardiomyopathy, cerebrovascular disease, coronary heart disease, heart failure, and peripheral vascular disease.                                                                                                                                                                    |             |             |
| § Not included here are non-melanoma skin cancer, benign neoplasms, cancers in situ, and neoplasms of uncertain behavior.                                                                                                                                                                                                                          |             |             |
| ¶ Immunocompromised state included human immunodeficiency virus infection, organ or tissue transplant, bone marrow biopsy, and use of any of the following medications (prescribed ≥2 times over the past year): systemic glucocorticoids, anti-inflammatory or anti-rheumatic agents in combination with glucocorticoids, and immunosuppressants. |             |             |
| Obesity was defined as a body-mass index (the weight in kilograms divided by the square of the height in meters) of 30 or greater.                                                                                                                                                                                                                 |             |             |

**eTable 4H.** Baseline Characteristics of Matched Persons in the Target Trial Emulation Evaluating the Comparative Safety of the BNT162b2 and mRNA-1273 Vaccines for Arrhythmia, Veterans Health Administration.\*

| <b>Characteristic</b>                                    | <b>BNT162b2 recipients<br/>(N=138,719)</b> | <b>mRNA-1273 recipients<br/>(N=138,719)</b> |
|----------------------------------------------------------|--------------------------------------------|---------------------------------------------|
| Median age (IQR) – yr                                    | 67.0 [57.0, 73.0]                          | 67.0 [57.0, 73.0]                           |
| Age group, no. (%)                                       |                                            |                                             |
| 18 to 39 years                                           | 8,286 (6)                                  | 8,286 (6)                                   |
| 40 to 49 years                                           | 10,345 (7)                                 | 10,345 (7)                                  |
| 50 to 59 years                                           | 23,383 (17)                                | 23,383 (17)                                 |
| 60 to 69 years                                           | 38,820 (28)                                | 38,820 (28)                                 |
| 70 to 79 years                                           | 47,884 (35)                                | 47,884 (35)                                 |
| ≥80 years                                                | 10,001 (7)                                 | 10,001 (7)                                  |
| Sex – no. (%)                                            |                                            |                                             |
| Male                                                     | 126,989 (92)                               | 126,989 (92)                                |
| Female                                                   | 11,730 (8)                                 | 11,730 (8)                                  |
| Race – no. (%)                                           |                                            |                                             |
| Black                                                    | 29,883 (22)                                | 29,883 (22)                                 |
| Other                                                    | 2,847 (2)                                  | 2,847 (2)                                   |
| Unknown                                                  | 4,428 (3)                                  | 4,428 (3)                                   |
| White                                                    | 101,561 (73)                               | 101,561 (73)                                |
| Ethnicity – no. (%)                                      |                                            |                                             |
| Hispanic                                                 | 10,661 (8)                                 | 14,657 (11)                                 |
| Not Hispanic                                             | 124,177 (90)                               | 120,141 (87)                                |
| Unknown                                                  | 3,881 (3)                                  | 3,921 (3)                                   |
| Urban residence – no. (%)                                | 102,002 (74)                               | 102,002 (74)                                |
| Smoking status – no. (%)                                 |                                            |                                             |
| Current                                                  | 46,838 (34)                                | 50,558 (36)                                 |
| Former                                                   | 42,039 (30)                                | 39,198 (28)                                 |
| Never                                                    | 49,842 (36)                                | 48,963 (35)                                 |
| Coexisting conditions – no. (%)                          |                                            |                                             |
| Chronic lung disease†                                    | 18,775 (14)                                | 20,669 (15)                                 |
| Cardiovascular disease‡                                  | 25,090 (18)                                | 25,085 (18)                                 |
| Hypertension                                             | 79,915 (58)                                | 82,157 (59)                                 |
| Diabetes                                                 | 42,172 (30)                                | 46,304 (33)                                 |
| Chronic kidney disease                                   | 9,600 (7)                                  | 10,358 (7)                                  |
| Liver disease                                            | 441 (<1)                                   | 378 (<1)                                    |
| Cancer§                                                  | 16,539 (12)                                | 15,732 (11)                                 |
| Immunocompromised state¶                                 | 8,985 (6)                                  | 8,651 (6)                                   |
| Obesity                                                  | 64,515 (47)                                | 64,879 (47)                                 |
| No. of primary care visits in the past 5 years – no. (%) |                                            |                                             |

| <b>eTable 4H. Baseline Characteristics of Matched Persons in the Target Trial Emulation Evaluating the Comparative Safety of the BNT162b2 and mRNA-1273 Vaccines for Arrhythmia, Veterans Health Administration.*</b>                                                                                                                              |             |             |
|----------------------------------------------------------------------------------------------------------------------------------------------------------------------------------------------------------------------------------------------------------------------------------------------------------------------------------------------------|-------------|-------------|
| 1-9                                                                                                                                                                                                                                                                                                                                                | 24,877 (18) | 20,433 (15) |
| 10-19                                                                                                                                                                                                                                                                                                                                              | 52,198 (38) | 50,371 (36) |
| 20-29                                                                                                                                                                                                                                                                                                                                              | 32,428 (23) | 34,622 (25) |
| ≥30                                                                                                                                                                                                                                                                                                                                                | 29,216 (21) | 33,293 (24) |
| No. of influenza vaccinations in the past 5 years – no. (%)                                                                                                                                                                                                                                                                                        |             |             |
| 0                                                                                                                                                                                                                                                                                                                                                  | 21,276 (15) | 21,044 (15) |
| 1 or 2                                                                                                                                                                                                                                                                                                                                             | 28,515 (21) | 27,884 (20) |
| 3 or 4                                                                                                                                                                                                                                                                                                                                             | 44,429 (32) | 44,449 (32) |
| ≥5                                                                                                                                                                                                                                                                                                                                                 | 44,499 (32) | 45,342 (33) |
| Abbreviation: IQR, interquartile range. Percentages may not total to 100% because of rounding.                                                                                                                                                                                                                                                     |             |             |
| * Persons included in this target trial emulation received a first dose of BNT162b2 or mRNA-1273 between January 4 and September 20, 2021.                                                                                                                                                                                                         |             |             |
| † Chronic lung disease included asthma, bronchitis, and chronic obstructive pulmonary disease.                                                                                                                                                                                                                                                     |             |             |
| ‡ Cardiovascular disease included acute myocardial infarction, cardiomyopathy, cerebrovascular disease, coronary heart disease, heart failure, and peripheral vascular disease.                                                                                                                                                                    |             |             |
| § Not included here are non-melanoma skin cancer, benign neoplasms, cancers in situ, and neoplasms of uncertain behavior.                                                                                                                                                                                                                          |             |             |
| ¶ Immunocompromised state included human immunodeficiency virus infection, organ or tissue transplant, bone marrow biopsy, and use of any of the following medications (prescribed ≥2 times over the past year): systemic glucocorticoids, anti-inflammatory or anti-rheumatic agents in combination with glucocorticoids, and immunosuppressants. |             |             |
| Obesity was defined as a body-mass index (the weight in kilograms divided by the square of the height in meters) of 30 or greater.                                                                                                                                                                                                                 |             |             |

**eTable 4I.** Baseline Characteristics of Matched Persons in the Target Trial Emulation Evaluating the Comparative Safety of the BNT162b2 and mRNA-1273 Vaccines for Kidney Injury, Veterans Health Administration.\*

| <b>Characteristic</b>                                    | <b>BNT162b2 recipients<br/>(N=178,804)</b> | <b>mRNA-1273 recipients<br/>(N=178,804)</b> |
|----------------------------------------------------------|--------------------------------------------|---------------------------------------------|
| Median age (IQR) – yr                                    | 68.0 [59.0, 74.0]                          | 68.0 [59.0, 74.0]                           |
| Age group, no. (%)                                       |                                            |                                             |
| 18 to 39 years                                           | 9,014 (5)                                  | 9,014 (5)                                   |
| 40 to 49 years                                           | 11,658 (7)                                 | 11,658 (7)                                  |
| 50 to 59 years                                           | 27,194 (15)                                | 27,194 (15)                                 |
| 60 to 69 years                                           | 47,983 (27)                                | 47,983 (27)                                 |
| 70 to 79 years                                           | 65,907 (37)                                | 65,907 (37)                                 |
| ≥80 years                                                | 16,248 (9)                                 | 16,248 (9)                                  |
| Sex – no. (%)                                            |                                            |                                             |
| Male                                                     | 163,475 (92)                               | 163,475 (92)                                |
| Female                                                   | 14,529 (8)                                 | 14,529 (8)                                  |
| Race – no. (%)                                           |                                            |                                             |
| Black                                                    | 34,091 (19)                                | 34,091 (19)                                 |
| Other                                                    | 3,469 (2)                                  | 3,469 (2)                                   |
| Unknown                                                  | 5,551 (3)                                  | 5,551 (3)                                   |
| White                                                    | 134,893 (76)                               | 134,893 (76)                                |
| Ethnicity – no. (%)                                      |                                            |                                             |
| Hispanic                                                 | 12,526 (7)                                 | 17,218 (10)                                 |
| Not Hispanic                                             | 160,388 (90)                               | 155,673 (87)                                |
| Unknown                                                  | 5,090 (3)                                  | 5,113 (3)                                   |
| Urban residence – no. (%)                                | 129,373 (73)                               | 129,373 (73)                                |
| Smoking status – no. (%)                                 |                                            |                                             |
| Current                                                  | 58,440 (33)                                | 63,195 (36)                                 |
| Former                                                   | 56,438 (32)                                | 52,937 (30)                                 |
| Never                                                    | 63,126 (35)                                | 61,872 (35)                                 |
| Coexisting conditions – no. (%)                          |                                            |                                             |
| Chronic lung disease†                                    | 26,574 (15)                                | 29,553 (17)                                 |
| Cardiovascular disease‡                                  | 40,499 (23)                                | 40,948 (23)                                 |
| Hypertension                                             | 104,411 (59)                               | 107,678 (60)                                |
| Diabetes                                                 | 52,373 (29)                                | 58,083 (33)                                 |
| Chronic kidney disease                                   | 0 (0)                                      | 0 (0)                                       |
| Liver disease                                            | 497 (<1)                                   | 478 (<1)                                    |
| Cancer§                                                  | 21,985 (12)                                | 21,072 (12)                                 |
| Immunocompromised state¶                                 | 11,442 (6)                                 | 11,338 (6)                                  |
| Obesity                                                  | 82,307 (46)                                | 82,883 (47)                                 |
| No. of primary care visits in the past 5 years – no. (%) |                                            |                                             |
| 1-9                                                      | 29,107 (16)                                | 23,678 (13)                                 |

| <b>eTable 4I. Baseline Characteristics of Matched Persons in the Target Trial Emulation Evaluating the Comparative Safety of the BNT162b2 and mRNA-1273 Vaccines for Kidney Injury, Veterans Health Administration.*</b>                                                                                                                           |             |             |
|----------------------------------------------------------------------------------------------------------------------------------------------------------------------------------------------------------------------------------------------------------------------------------------------------------------------------------------------------|-------------|-------------|
| 10-19                                                                                                                                                                                                                                                                                                                                              | 64,728 (36) | 62,325 (35) |
| 20-29                                                                                                                                                                                                                                                                                                                                              | 42,874 (24) | 45,236 (25) |
| ≥30                                                                                                                                                                                                                                                                                                                                                | 41,295 (23) | 46,765 (26) |
| No. of influenza vaccinations in the past 5 years – no. (%)                                                                                                                                                                                                                                                                                        |             |             |
| 0                                                                                                                                                                                                                                                                                                                                                  | 25,835 (15) | 25,505 (14) |
| 1 or 2                                                                                                                                                                                                                                                                                                                                             | 34,298 (19) | 33,270 (19) |
| 3 or 4                                                                                                                                                                                                                                                                                                                                             | 56,812 (32) | 56,670 (32) |
| ≥5                                                                                                                                                                                                                                                                                                                                                 | 61,059 (34) | 62,559 (35) |
| Abbreviation: IQR, interquartile range. Percentages may not total to 100% because of rounding.                                                                                                                                                                                                                                                     |             |             |
| * Persons included in this target trial emulation received a first dose of BNT162b2 or mRNA-1273 between January 4 and September 20, 2021.                                                                                                                                                                                                         |             |             |
| † Chronic lung disease included asthma, bronchitis, and chronic obstructive pulmonary disease.                                                                                                                                                                                                                                                     |             |             |
| ‡ Cardiovascular disease included acute myocardial infarction, cardiomyopathy, cerebrovascular disease, coronary heart disease, heart failure, and peripheral vascular disease.                                                                                                                                                                    |             |             |
| § Not included here are non-melanoma skin cancer, benign neoplasms, cancers in situ, and neoplasms of uncertain behavior.                                                                                                                                                                                                                          |             |             |
| ¶ Immunocompromised state included human immunodeficiency virus infection, organ or tissue transplant, bone marrow biopsy, and use of any of the following medications (prescribed ≥2 times over the past year): systemic glucocorticoids, anti-inflammatory or anti-rheumatic agents in combination with glucocorticoids, and immunosuppressants. |             |             |
| Obesity was defined as a body-mass index (the weight in kilograms divided by the square of the height in meters) of 30 or greater.                                                                                                                                                                                                                 |             |             |

**eTable 4J.** Baseline Characteristics of Matched Persons in the Target Trial Emulation Evaluating the Comparative Safety of the BNT162b2 and mRNA-1273 Vaccines for Appendicitis, Veterans Health Administration.\*

| <b>Characteristic</b>                                    | <b>BNT162b2 recipients<br/>(N=214,428)</b> | <b>mRNA-1273 recipients<br/>(N=214,428)</b> |
|----------------------------------------------------------|--------------------------------------------|---------------------------------------------|
| Median age (IQR) – yr                                    | 69.0 [60.0, 74.0]                          | 69.0 [60.0, 74.0]                           |
| Age group, no. (%)                                       |                                            |                                             |
| 18 to 39 years                                           | 9,167 (4)                                  | 9,167 (4)                                   |
| 40 to 49 years                                           | 12,200 (6)                                 | 12,200 (6)                                  |
| 50 to 59 years                                           | 30,019 (14)                                | 30,019 (14)                                 |
| 60 to 69 years                                           | 57,101 (27)                                | 57,101 (27)                                 |
| 70 to 79 years                                           | 83,519 (39)                                | 83,519 (39)                                 |
| ≥80 years                                                | 22,422 (10)                                | 22,422 (10)                                 |
| Sex – no. (%)                                            |                                            |                                             |
| Male                                                     | 198,712 (93)                               | 198,712 (93)                                |
| Female                                                   | 15,716 (7)                                 | 15,716 (7)                                  |
| Race – no. (%)                                           |                                            |                                             |
| Black                                                    | 43,117 (20)                                | 43,117 (20)                                 |
| Other                                                    | 4,152 (2)                                  | 4,152 (2)                                   |
| Unknown                                                  | 6,523 (3)                                  | 6,523 (3)                                   |
| White                                                    | 160,636 (75)                               | 160,636 (75)                                |
| Ethnicity – no. (%)                                      |                                            |                                             |
| Hispanic                                                 | 14,597 (7)                                 | 20,070 (9)                                  |
| Not Hispanic                                             | 193,777 (90)                               | 188,252 (88)                                |
| Unknown                                                  | 6,054 (3)                                  | 6,106 (3)                                   |
| Urban residence – no. (%)                                | 156,212 (73)                               | 156,212 (73)                                |
| Smoking status – no. (%)                                 |                                            |                                             |
| Current                                                  | 70,037 (33)                                | 75,809 (35)                                 |
| Former                                                   | 69,317 (32)                                | 65,251 (30)                                 |
| Never                                                    | 75,074 (35)                                | 73,368 (34)                                 |
| Coexisting conditions – no. (%)                          |                                            |                                             |
| Chronic lung disease†                                    | 35,291 (16)                                | 38,470 (18)                                 |
| Cardiovascular disease‡                                  | 58,552 (27)                                | 58,601 (27)                                 |
| Hypertension                                             | 135,873 (63)                               | 139,180 (65)                                |
| Diabetes                                                 | 72,268 (34)                                | 78,565 (37)                                 |
| Chronic kidney disease                                   | 20,519 (10)                                | 21,602 (10)                                 |
| Liver disease                                            | 805 (<1)                                   | 749 (<1)                                    |
| Cancer§                                                  | 29,985 (14)                                | 28,156 (13)                                 |
| Immunocompromised state¶                                 | 17,098 (8)                                 | 16,510 (8)                                  |
| Obesity                                                  | 99,547 (46)                                | 100,051 (47)                                |
| No. of primary care visits in the past 5 years – no. (%) |                                            |                                             |



| <b>eTable 4J. Baseline Characteristics of Matched Persons in the Target Trial Emulation Evaluating the Comparative Safety of the BNT162b2 and mRNA-1273 Vaccines for Appendicitis, Veterans Health Administration.*</b>                                                                                                                            |             |             |
|----------------------------------------------------------------------------------------------------------------------------------------------------------------------------------------------------------------------------------------------------------------------------------------------------------------------------------------------------|-------------|-------------|
| 1-9                                                                                                                                                                                                                                                                                                                                                | 30,733 (14) | 25,273 (12) |
| 10-19                                                                                                                                                                                                                                                                                                                                              | 71,955 (34) | 69,324 (32) |
| 20-29                                                                                                                                                                                                                                                                                                                                              | 51,889 (24) | 54,374 (25) |
| ≥30                                                                                                                                                                                                                                                                                                                                                | 59,851 (28) | 65,457 (31) |
| No. of influenza vaccinations in the past 5 years – no. (%)                                                                                                                                                                                                                                                                                        |             |             |
| 0                                                                                                                                                                                                                                                                                                                                                  | 29,431 (14) | 29,348 (14) |
| 1 or 2                                                                                                                                                                                                                                                                                                                                             | 38,664 (18) | 37,828 (18) |
| 3 or 4                                                                                                                                                                                                                                                                                                                                             | 67,514 (31) | 67,464 (31) |
| ≥5                                                                                                                                                                                                                                                                                                                                                 | 78,819 (37) | 79,788 (37) |
| Abbreviation: IQR, interquartile range. Percentages may not total to 100% because of rounding.                                                                                                                                                                                                                                                     |             |             |
| * Persons included in this target trial emulation received a first dose of BNT162b2 or mRNA-1273 between January 4 and September 20, 2021.                                                                                                                                                                                                         |             |             |
| † Chronic lung disease included asthma, bronchitis, and chronic obstructive pulmonary disease.                                                                                                                                                                                                                                                     |             |             |
| ‡ Cardiovascular disease included acute myocardial infarction, cardiomyopathy, cerebrovascular disease, coronary heart disease, heart failure, and peripheral vascular disease.                                                                                                                                                                    |             |             |
| § Not included here are non-melanoma skin cancer, benign neoplasms, cancers in situ, and neoplasms of uncertain behavior.                                                                                                                                                                                                                          |             |             |
| ¶ Immunocompromised state included human immunodeficiency virus infection, organ or tissue transplant, bone marrow biopsy, and use of any of the following medications (prescribed ≥2 times over the past year): systemic glucocorticoids, anti-inflammatory or anti-rheumatic agents in combination with glucocorticoids, and immunosuppressants. |             |             |
| Obesity was defined as a body-mass index (the weight in kilograms divided by the square of the height in meters) of 30 or greater.                                                                                                                                                                                                                 |             |             |

**eTable 4K.** Baseline Characteristics of Matched Persons in the Target Trial Emulation Evaluating the Comparative Safety of the BNT162b2 and mRNA-1273 Vaccines for Autoimmune Events, Veterans Health Administration.\*

| <b>Characteristic</b>                                    | <b>BNT162b2 recipients<br/>(N=188,044)</b> | <b>mRNA-1273 recipients<br/>(N=188,044)</b> |
|----------------------------------------------------------|--------------------------------------------|---------------------------------------------|
| Median age (IQR) – yr                                    | 69.0 [60.0, 74.0]                          | 69.0 [60.0, 74.0]                           |
| Age group, no. (%)                                       |                                            |                                             |
| 18 to 39 years                                           | 8,557 (5)                                  | 8,557 (5)                                   |
| 40 to 49 years                                           | 10,972 (6)                                 | 10,972 (6)                                  |
| 50 to 59 years                                           | 26,517 (14)                                | 26,517 (14)                                 |
| 60 to 69 years                                           | 49,766 (26)                                | 49,766 (26)                                 |
| 70 to 79 years                                           | 72,530 (39)                                | 72,530 (39)                                 |
| ≥80 years                                                | 19,702 (10)                                | 19,702 (10)                                 |
| Sex – no. (%)                                            |                                            |                                             |
| Male                                                     | 175,187 (93)                               | 175,187 (93)                                |
| Female                                                   | 12,857 (7)                                 | 12,857 (7)                                  |
| Race – no. (%)                                           |                                            |                                             |
| Black                                                    | 37,946 (20)                                | 37,946 (20)                                 |
| Other                                                    | 3,599 (2)                                  | 3,599 (2)                                   |
| Unknown                                                  | 5,747 (3)                                  | 5,747 (3)                                   |
| White                                                    | 140,752 (75)                               | 140,752 (75)                                |
| Ethnicity – no. (%)                                      |                                            |                                             |
| Hispanic                                                 | 12,778 (7)                                 | 17,746 (9)                                  |
| Not Hispanic                                             | 169,973 (90)                               | 164,917 (88)                                |
| Unknown                                                  | 5,293 (3)                                  | 5,381 (3)                                   |
| Urban residence – no. (%)                                | 137,003 (73)                               | 137,003 (73)                                |
| Smoking status – no. (%)                                 |                                            |                                             |
| Current                                                  | 61,368 (33)                                | 66,212 (35)                                 |
| Former                                                   | 60,159 (32)                                | 56,635 (30)                                 |
| Never                                                    | 66,517 (35)                                | 65,197 (35)                                 |
| Coexisting conditions – no. (%)                          |                                            |                                             |
| Chronic lung disease†                                    | 29,877 (16)                                | 32,366 (17)                                 |
| Cardiovascular disease‡                                  | 50,446 (27)                                | 50,494 (27)                                 |
| Hypertension                                             | 118,116 (63)                               | 121,434 (65)                                |
| Diabetes                                                 | 62,862 (33)                                | 68,374 (36)                                 |
| Chronic kidney disease                                   | 17,409 (9)                                 | 18,305 (10)                                 |
| Liver disease                                            | 671 (<1)                                   | 589 (<1)                                    |
| Cancer§                                                  | 25,857 (14)                                | 24,305 (13)                                 |
| Immunocompromised state¶                                 | 11,806 (6)                                 | 11,436 (6)                                  |
| Obesity                                                  | 87,325 (46)                                | 88,033 (47)                                 |
| No. of primary care visits in the past 5 years – no. (%) |                                            |                                             |

| <b>eTable 4K. Baseline Characteristics of Matched Persons in the Target Trial Emulation Evaluating the Comparative Safety of the BNT162b2 and mRNA-1273 Vaccines for Autoimmune Events, Veterans Health Administration.*</b>                                                                                                                       |             |             |
|----------------------------------------------------------------------------------------------------------------------------------------------------------------------------------------------------------------------------------------------------------------------------------------------------------------------------------------------------|-------------|-------------|
| 1-9                                                                                                                                                                                                                                                                                                                                                | 28,348 (15) | 23,453 (12) |
| 10-19                                                                                                                                                                                                                                                                                                                                              | 64,666 (34) | 62,604 (33) |
| 20-29                                                                                                                                                                                                                                                                                                                                              | 45,317 (24) | 47,517 (25) |
| ≥30                                                                                                                                                                                                                                                                                                                                                | 49,713 (26) | 54,470 (29) |
| No. of influenza vaccinations in the past 5 years – no. (%)                                                                                                                                                                                                                                                                                        |             |             |
| 0                                                                                                                                                                                                                                                                                                                                                  | 26,221 (14) | 26,092 (14) |
| 1 or 2                                                                                                                                                                                                                                                                                                                                             | 34,936 (19) | 34,085 (18) |
| 3 or 4                                                                                                                                                                                                                                                                                                                                             | 59,655 (32) | 59,752 (32) |
| ≥5                                                                                                                                                                                                                                                                                                                                                 | 67,232 (36) | 68,115 (36) |
| Abbreviation: IQR, interquartile range. Percentages may not total to 100% because of rounding.                                                                                                                                                                                                                                                     |             |             |
| * Persons included in this target trial emulation received a first dose of BNT162b2 or mRNA-1273 between January 4 and September 20, 2021.                                                                                                                                                                                                         |             |             |
| † Chronic lung disease included asthma, bronchitis, and chronic obstructive pulmonary disease.                                                                                                                                                                                                                                                     |             |             |
| ‡ Cardiovascular disease included acute myocardial infarction, cardiomyopathy, cerebrovascular disease, coronary heart disease, heart failure, and peripheral vascular disease.                                                                                                                                                                    |             |             |
| § Not included here are non-melanoma skin cancer, benign neoplasms, cancers in situ, and neoplasms of uncertain behavior.                                                                                                                                                                                                                          |             |             |
| ¶ Immunocompromised state included human immunodeficiency virus infection, organ or tissue transplant, bone marrow biopsy, and use of any of the following medications (prescribed ≥2 times over the past year): systemic glucocorticoids, anti-inflammatory or anti-rheumatic agents in combination with glucocorticoids, and immunosuppressants. |             |             |
| Obesity was defined as a body-mass index (the weight in kilograms divided by the square of the height in meters) of 30 or greater.                                                                                                                                                                                                                 |             |             |

**eTable 4L.** Baseline Characteristics of Matched Persons in the Target Trial Emulation Evaluating the Comparative Safety of the BNT162b2 and mRNA-1273 Vaccines for Herpes Zoster or Simplex, Veterans Health Administration.\*

| <b>Characteristic</b>                                    | <b>BNT162b2 recipients<br/>(N=193,528)</b> | <b>mRNA-1273 recipients<br/>(N=193,528)</b> |
|----------------------------------------------------------|--------------------------------------------|---------------------------------------------|
| Median age (IQR) – yr                                    | 69.0 [60.0, 74.0]                          | 69.0 [60.0, 74.0]                           |
| Age group, no. (%)                                       |                                            |                                             |
| 18 to 39 years                                           | 8,388 (4)                                  | 8,388 (4)                                   |
| 40 to 49 years                                           | 10,944 (6)                                 | 10,944 (6)                                  |
| 50 to 59 years                                           | 27,281 (14)                                | 27,281 (14)                                 |
| 60 to 69 years                                           | 51,838 (27)                                | 51,838 (27)                                 |
| 70 to 79 years                                           | 75,180 (39)                                | 75,180 (39)                                 |
| ≥80 years                                                | 19,897 (10)                                | 19,897 (10)                                 |
| Sex – no. (%)                                            |                                            |                                             |
| Male                                                     | 180,688 (93)                               | 180,688 (93)                                |
| Female                                                   | 12,840 (7)                                 | 12,840 (7)                                  |
| Race – no. (%)                                           |                                            |                                             |
| Black                                                    | 38,955 (20)                                | 38,955 (20)                                 |
| Other                                                    | 3,701 (2)                                  | 3,701 (2)                                   |
| Unknown                                                  | 5,910 (3)                                  | 5,910 (3)                                   |
| White                                                    | 144,962 (75)                               | 144,962 (75)                                |
| Ethnicity – no. (%)                                      |                                            |                                             |
| Hispanic                                                 | 13,093 (7)                                 | 18,282 (9)                                  |
| Not Hispanic                                             | 174,931 (90)                               | 169,806 (88)                                |
| Unknown                                                  | 5,504 (3)                                  | 5,440 (3)                                   |
| Urban residence – no. (%)                                | 140,711 (73)                               | 140,711 (73)                                |
| Smoking status – no. (%)                                 |                                            |                                             |
| Current                                                  | 63,975 (33)                                | 68,933 (36)                                 |
| Former                                                   | 62,436 (32)                                | 58,747 (30)                                 |
| Never                                                    | 67,117 (35)                                | 65,848 (34)                                 |
| Coexisting conditions – no. (%)                          |                                            |                                             |
| Chronic lung disease†                                    | 31,315 (16)                                | 34,081 (18)                                 |
| Cardiovascular disease‡                                  | 52,577 (27)                                | 52,296 (27)                                 |
| Hypertension                                             | 122,788 (63)                               | 125,721 (65)                                |
| Diabetes                                                 | 65,180 (34)                                | 70,955 (37)                                 |
| Chronic kidney disease                                   | 18,221 (9)                                 | 19,169 (10)                                 |
| Liver disease                                            | 729 (<1)                                   | 679 (<1)                                    |
| Cancer§                                                  | 26,703 (14)                                | 25,115 (13)                                 |
| Immunocompromised state¶                                 | 14,511 (7)                                 | 13,958 (7)                                  |
| Obesity                                                  | 90,640 (47)                                | 91,200 (47)                                 |
| No. of primary care visits in the past 5 years – no. (%) |                                            |                                             |

**eTable 4L.** Baseline Characteristics of Matched Persons in the Target Trial Emulation Evaluating the Comparative Safety of the BNT162b2 and mRNA-1273 Vaccines for Herpes Zoster or Simplex, Veterans Health Administration.\*

|                                                                                                                                                                                                                                                                                                                                                    |             |             |
|----------------------------------------------------------------------------------------------------------------------------------------------------------------------------------------------------------------------------------------------------------------------------------------------------------------------------------------------------|-------------|-------------|
| 1-9                                                                                                                                                                                                                                                                                                                                                | 29,077 (15) | 24,069 (12) |
| 10-19                                                                                                                                                                                                                                                                                                                                              | 66,368 (34) | 64,092 (33) |
| 20-29                                                                                                                                                                                                                                                                                                                                              | 46,491 (24) | 48,710 (25) |
| ≥30                                                                                                                                                                                                                                                                                                                                                | 51,592 (27) | 56,657 (29) |
| No. of influenza vaccinations in the past 5 years – no. (%)                                                                                                                                                                                                                                                                                        |             |             |
| 0                                                                                                                                                                                                                                                                                                                                                  | 26,961 (14) | 26,925 (14) |
| 1 or 2                                                                                                                                                                                                                                                                                                                                             | 35,665 (18) | 34,794 (18) |
| 3 or 4                                                                                                                                                                                                                                                                                                                                             | 61,279 (32) | 61,341 (32) |
| ≥5                                                                                                                                                                                                                                                                                                                                                 | 69,623 (36) | 70,468 (36) |
| Abbreviation: IQR, interquartile range. Percentages may not total to 100% because of rounding.                                                                                                                                                                                                                                                     |             |             |
| * Persons included in this target trial emulation received a first dose of BNT162b2 or mRNA-1273 between January 4 and September 20, 2021.                                                                                                                                                                                                         |             |             |
| † Chronic lung disease included asthma, bronchitis, and chronic obstructive pulmonary disease.                                                                                                                                                                                                                                                     |             |             |
| ‡ Cardiovascular disease included acute myocardial infarction, cardiomyopathy, cerebrovascular disease, coronary heart disease, heart failure, and peripheral vascular disease.                                                                                                                                                                    |             |             |
| § Not included here are non-melanoma skin cancer, benign neoplasms, cancers in situ, and neoplasms of uncertain behavior.                                                                                                                                                                                                                          |             |             |
| ¶ Immunocompromised state included human immunodeficiency virus infection, organ or tissue transplant, bone marrow biopsy, and use of any of the following medications (prescribed ≥2 times over the past year): systemic glucocorticoids, anti-inflammatory or anti-rheumatic agents in combination with glucocorticoids, and immunosuppressants. |             |             |
| Obesity was defined as a body-mass index (the weight in kilograms divided by the square of the height in meters) of 30 or greater.                                                                                                                                                                                                                 |             |             |

**eTable 4M.** Baseline Characteristics of Matched Persons in the Target Trial Emulation Evaluating the Comparative Safety of the BNT162b2 and mRNA-1273 Vaccines for Arthritis, Veterans Health Administration.\*

| <b>Characteristic</b>                                    | <b>BNT162b2 recipients<br/>(N=198,866)</b> | <b>mRNA-1273 recipients<br/>(N=198,866)</b> |
|----------------------------------------------------------|--------------------------------------------|---------------------------------------------|
| Median age (IQR) – yr                                    | 69.0 [60.0, 74.0]                          | 69.0 [60.0, 74.0]                           |
| Age group, no. (%)                                       |                                            |                                             |
| 18 to 39 years                                           | 8,970 (5)                                  | 8,970 (5)                                   |
| 40 to 49 years                                           | 11,483 (6)                                 | 11,483 (6)                                  |
| 50 to 59 years                                           | 27,441 (14)                                | 27,441 (14)                                 |
| 60 to 69 years                                           | 52,343 (26)                                | 52,343 (26)                                 |
| 70 to 79 years                                           | 77,577 (39)                                | 77,577 (39)                                 |
| ≥80 years                                                | 21,052 (11)                                | 21,052 (11)                                 |
| Sex – no. (%)                                            |                                            |                                             |
| Male                                                     | 184,522 (93)                               | 184,522 (93)                                |
| Female                                                   | 14,344 (7)                                 | 14,344 (7)                                  |
| Race – no. (%)                                           |                                            |                                             |
| Black                                                    | 38,745 (19)                                | 38,745 (19)                                 |
| Other                                                    | 3,848 (2)                                  | 3,848 (2)                                   |
| Unknown                                                  | 6,115 (3)                                  | 6,115 (3)                                   |
| White                                                    | 150,158 (76)                               | 150,158 (76)                                |
| Ethnicity – no. (%)                                      |                                            |                                             |
| Hispanic                                                 | 13,552 (7)                                 | 18,561 (9)                                  |
| Not Hispanic                                             | 179,664 (90)                               | 174,555 (88)                                |
| Unknown                                                  | 5,650 (3)                                  | 5,750 (3)                                   |
| Urban residence – no. (%)                                | 144,781 (73)                               | 144,781 (73)                                |
| Smoking status – no. (%)                                 |                                            |                                             |
| Current                                                  | 65,612 (33)                                | 70,823 (36)                                 |
| Former                                                   | 64,092 (32)                                | 60,401 (30)                                 |
| Never                                                    | 69,162 (35)                                | 67,642 (34)                                 |
| Coexisting conditions – no. (%)                          |                                            |                                             |
| Chronic lung disease†                                    | 32,336 (16)                                | 35,271 (18)                                 |
| Cardiovascular disease‡                                  | 53,713 (27)                                | 53,960 (27)                                 |
| Hypertension                                             | 124,527 (63)                               | 127,802 (64)                                |
| Diabetes                                                 | 65,637 (33)                                | 71,332 (36)                                 |
| Chronic kidney disease                                   | 18,525 (9)                                 | 19,390 (10)                                 |
| Liver disease                                            | 711 (<1)                                   | 659 (<1)                                    |
| Cancer§                                                  | 27,739 (14)                                | 26,217 (13)                                 |
| Immunocompromised state¶                                 | 15,138 (8)                                 | 14,683 (7)                                  |
| Obesity                                                  | 91,121 (46)                                | 91,439 (46)                                 |
| No. of primary care visits in the past 5 years – no. (%) |                                            |                                             |
| 1-9                                                      | 29,710 (15)                                | 24,600 (12)                                 |

| <b>eTable 4M. Baseline Characteristics of Matched Persons in the Target Trial Emulation Evaluating the Comparative Safety of the BNT162b2 and mRNA-1273 Vaccines for Arthritis, Veterans Health Administration.*</b>                                                                                                                               |             |             |
|----------------------------------------------------------------------------------------------------------------------------------------------------------------------------------------------------------------------------------------------------------------------------------------------------------------------------------------------------|-------------|-------------|
| 10-19                                                                                                                                                                                                                                                                                                                                              | 68,249 (34) | 66,058 (33) |
| 20-29                                                                                                                                                                                                                                                                                                                                              | 47,784 (24) | 50,199 (25) |
| ≥30                                                                                                                                                                                                                                                                                                                                                | 53,123 (27) | 58,009 (29) |
| No. of influenza vaccinations in the past 5 years – no. (%)                                                                                                                                                                                                                                                                                        |             |             |
| 0                                                                                                                                                                                                                                                                                                                                                  | 27,794 (14) | 27,532 (14) |
| 1 or 2                                                                                                                                                                                                                                                                                                                                             | 36,602 (18) | 35,650 (18) |
| 3 or 4                                                                                                                                                                                                                                                                                                                                             | 62,655 (32) | 62,759 (32) |
| ≥5                                                                                                                                                                                                                                                                                                                                                 | 71,815 (36) | 72,925 (37) |
| Abbreviation: IQR, interquartile range. Percentages may not total to 100% because of rounding.                                                                                                                                                                                                                                                     |             |             |
| * Persons included in this target trial emulation received a first dose of BNT162b2 or mRNA-1273 between January 4 and September 20, 2021.                                                                                                                                                                                                         |             |             |
| † Chronic lung disease included asthma, bronchitis, and chronic obstructive pulmonary disease.                                                                                                                                                                                                                                                     |             |             |
| ‡ Cardiovascular disease included acute myocardial infarction, cardiomyopathy, cerebrovascular disease, coronary heart disease, heart failure, and peripheral vascular disease.                                                                                                                                                                    |             |             |
| § Not included here are non-melanoma skin cancer, benign neoplasms, cancers in situ, and neoplasms of uncertain behavior.                                                                                                                                                                                                                          |             |             |
| ¶ Immunocompromised state included human immunodeficiency virus infection, organ or tissue transplant, bone marrow biopsy, and use of any of the following medications (prescribed ≥2 times over the past year): systemic glucocorticoids, anti-inflammatory or anti-rheumatic agents in combination with glucocorticoids, and immunosuppressants. |             |             |
| Obesity was defined as a body-mass index (the weight in kilograms divided by the square of the height in meters) of 30 or greater.                                                                                                                                                                                                                 |             |             |

**eTable 4N.** Baseline Characteristics of Matched Persons in the Target Trial Emulation Evaluating the Comparative Safety of the BNT162b2 and mRNA-1273 Vaccines for Pneumonia, Veterans Health Administration.\*

| <b>Characteristic</b>                                    | <b>BNT162b2 recipients<br/>(N=189,989)</b> | <b>mRNA-1273 recipients<br/>(N=189,989)</b> |
|----------------------------------------------------------|--------------------------------------------|---------------------------------------------|
| Median age (IQR) – yr                                    | 69.0 [59.0, 74.0]                          | 69.0 [59.0, 74.0]                           |
| Age group, no. (%)                                       |                                            |                                             |
| 18 to 39 years                                           | 8,909 (5)                                  | 8,909 (5)                                   |
| 40 to 49 years                                           | 11,571 (6)                                 | 11,571 (6)                                  |
| 50 to 59 years                                           | 27,646 (15)                                | 27,646 (15)                                 |
| 60 to 69 years                                           | 50,073 (26)                                | 50,073 (26)                                 |
| 70 to 79 years                                           | 72,573 (38)                                | 72,573 (38)                                 |
| ≥80 years                                                | 19,217 (10)                                | 19,217 (10)                                 |
| Sex – no. (%)                                            |                                            |                                             |
| Male                                                     | 175,968 (93)                               | 175,968 (93)                                |
| Female                                                   | 14,021 (7)                                 | 14,021 (7)                                  |
| Race – no. (%)                                           |                                            |                                             |
| Black                                                    | 38,476 (20)                                | 38,476 (20)                                 |
| Other                                                    | 3,708 (2)                                  | 3,708 (2)                                   |
| Unknown                                                  | 5,941 (3)                                  | 5,941 (3)                                   |
| White                                                    | 141,864 (75)                               | 141,864 (75)                                |
| Ethnicity – no. (%)                                      |                                            |                                             |
| Hispanic                                                 | 13,228 (7)                                 | 18,280 (10)                                 |
| Not Hispanic                                             | 171,353 (90)                               | 166,317 (88)                                |
| Unknown                                                  | 5,408 (3)                                  | 5,392 (3)                                   |
| Urban residence – no. (%)                                | 138,725 (73)                               | 138,725 (73)                                |
| Smoking status – no. (%)                                 |                                            |                                             |
| Current                                                  | 59,947 (32)                                | 64,833 (34)                                 |
| Former                                                   | 61,583 (32)                                | 57,797 (30)                                 |
| Never                                                    | 68,459 (36)                                | 67,359 (35)                                 |
| Coexisting conditions – no. (%)                          |                                            |                                             |
| Chronic lung disease†                                    | 25,815 (14)                                | 28,004 (15)                                 |
| Cardiovascular disease‡                                  | 47,796 (25)                                | 47,772 (25)                                 |
| Hypertension                                             | 117,959 (62)                               | 120,969 (64)                                |
| Diabetes                                                 | 61,785 (33)                                | 67,443 (35)                                 |
| Chronic kidney disease                                   | 16,434 (9)                                 | 17,354 (9)                                  |
| Liver disease                                            | 639 (<1)                                   | 605 (<1)                                    |
| Cancer§                                                  | 24,871 (13)                                | 23,221 (12)                                 |
| Immunocompromised state¶                                 | 12,980 (7)                                 | 12,336 (6)                                  |
| Obesity                                                  | 88,483 (47)                                | 89,013 (47)                                 |
| No. of primary care visits in the past 5 years – no. (%) |                                            |                                             |



| <b>eTable 4N. Baseline Characteristics of Matched Persons in the Target Trial Emulation Evaluating the Comparative Safety of the BNT162b2 and mRNA-1273 Vaccines for Pneumonia, Veterans Health Administration.*</b>                                                                                                                               |             |             |
|----------------------------------------------------------------------------------------------------------------------------------------------------------------------------------------------------------------------------------------------------------------------------------------------------------------------------------------------------|-------------|-------------|
| 1-9                                                                                                                                                                                                                                                                                                                                                | 29,636 (16) | 24,464 (13) |
| 10-19                                                                                                                                                                                                                                                                                                                                              | 67,345 (35) | 65,253 (34) |
| 20-29                                                                                                                                                                                                                                                                                                                                              | 46,084 (24) | 48,388 (25) |
| ≥30                                                                                                                                                                                                                                                                                                                                                | 46,924 (25) | 51,884 (27) |
| No. of influenza vaccinations in the past 5 years – no. (%)                                                                                                                                                                                                                                                                                        |             |             |
| 0                                                                                                                                                                                                                                                                                                                                                  | 27,176 (14) | 26,957 (14) |
| 1 or 2                                                                                                                                                                                                                                                                                                                                             | 35,537 (19) | 34,774 (18) |
| 3 or 4                                                                                                                                                                                                                                                                                                                                             | 60,409 (32) | 60,473 (32) |
| ≥5                                                                                                                                                                                                                                                                                                                                                 | 66,867 (35) | 67,785 (36) |
| Abbreviation: IQR, interquartile range. Percentages may not total to 100% because of rounding.                                                                                                                                                                                                                                                     |             |             |
| * Persons included in this target trial emulation received a first dose of BNT162b2 or mRNA-1273 between January 4 and September 20, 2021.                                                                                                                                                                                                         |             |             |
| † Chronic lung disease included asthma, bronchitis, and chronic obstructive pulmonary disease.                                                                                                                                                                                                                                                     |             |             |
| ‡ Cardiovascular disease included acute myocardial infarction, cardiomyopathy, cerebrovascular disease, coronary heart disease, heart failure, and peripheral vascular disease.                                                                                                                                                                    |             |             |
| § Not included here are non-melanoma skin cancer, benign neoplasms, cancers in situ, and neoplasms of uncertain behavior.                                                                                                                                                                                                                          |             |             |
| ¶ Immunocompromised state included human immunodeficiency virus infection, organ or tissue transplant, bone marrow biopsy, and use of any of the following medications (prescribed ≥2 times over the past year): systemic glucocorticoids, anti-inflammatory or anti-rheumatic agents in combination with glucocorticoids, and immunosuppressants. |             |             |
| Obesity was defined as a body-mass index (the weight in kilograms divided by the square of the height in meters) of 30 or greater.                                                                                                                                                                                                                 |             |             |

**eTable 5. Secondary Analysis Without Censoring Incident SARS-CoV-2 Infections During the Follow-up: Estimated Risks of Potential Adverse Events**

| <b>eTable S5.</b> Secondary Analysis Without Censoring Incident SARS-CoV-2 Infections During the Follow-up: Estimated Comparative Safety of the BNT162b2 and mRNA-1273 Vaccines, Veterans Health Administration (January 4–October 5, 2021).* |                |               |           |                                                              |                      |                                                                          |                               |
|-----------------------------------------------------------------------------------------------------------------------------------------------------------------------------------------------------------------------------------------------|----------------|---------------|-----------|--------------------------------------------------------------|----------------------|--------------------------------------------------------------------------|-------------------------------|
| Event                                                                                                                                                                                                                                         | No. of persons | No. of events |           | 38-week risk<br><i>no. of events/10,000 persons (95% CI)</i> |                      | Risk difference<br><i>no. of events/<br/>10,000 persons<br/>(95% CI)</i> | Risk ratio<br><i>(95% CI)</i> |
|                                                                                                                                                                                                                                               |                | BNT162b2      | mRNA-1273 | BNT162b2                                                     | mRNA-1273            |                                                                          |                               |
| Neurologic†                                                                                                                                                                                                                                   | 233,970        | 3,027         | 3,014     | 317.7 (305.1, 336.5)                                         | 309.6 (293.3, 321.4) | 8.1 (-6.9, 33.1)                                                         | 1.03 (0.98, 1.11)             |
| Hematologic‡                                                                                                                                                                                                                                  | 279,014        | 3,756         | 3,755     | 347.5 (333.1, 368.8)                                         | 350.1 (331.8, 364.5) | -2.6 (-23.0, 25.4)                                                       | 0.99 (0.94, 1.08)             |
| Hemorrhagic stroke                                                                                                                                                                                                                            | 431,508        | 84            | 70        | 4.5 (3.2, 5.1)                                               | 3.6 (3.0, 5.1)       | 0.9 (-1.3, 1.5)                                                          | 1.24 (0.72, 1.44)             |
| Ischemic stroke                                                                                                                                                                                                                               | 392,262        | 1,201         | 1,017     | 75.8 (71.3, 81.5)                                            | 64.0 (60.8, 72.5)    | 11.8 (1.7, 17.3)                                                         | 1.18 (1.02, 1.28)             |
| Myocardial infarction                                                                                                                                                                                                                         | 406,136        | 987           | 779       | 63.5 (59.0, 71.1)                                            | 46.7 (44.2, 52.4)    | 16.7 (9.8, 24.2)                                                         | 1.36 (1.20, 1.53)             |
| Other thromboembolic§                                                                                                                                                                                                                         | 402,126        | 1,207         | 934       | 72.4 (69.1, 79.1)                                            | 58.6 (55.2, 65.2)    | 13.8 (6.8, 21.7)                                                         | 1.24 (1.10, 1.38)             |
| Myocarditis or pericarditis                                                                                                                                                                                                                   | 429,564        | 83            | 51        | 5.5 (3.4, 6.6)                                               | 2.9 (2.1, 3.8)       | 2.6 (0.0, 3.7)                                                           | 1.92 (1.00, 2.50)             |
| Arrhythmia                                                                                                                                                                                                                                    | 277,438        | 3,087         | 2,752     | 285.8 (265.5, 294.1)                                         | 253.8 (244.4, 267.9) | 32.0 (5.1, 43.4)                                                         | 1.13 (1.02, 1.17)             |
| Kidney injury                                                                                                                                                                                                                                 | 356,008        | 1,944         | 1,577     | 136.6 (130.7, 147.6)                                         | 112.7 (104.2, 120.3) | 23.9 (15.9, 38.0)                                                        | 1.21 (1.13, 1.35)             |
| Appendicitis                                                                                                                                                                                                                                  | 428,856        | 86            | 82        | 4.8 (4.2, 7.0)                                               | 4.7 (3.2, 5.3)       | 0.1 (-0.4, 3.2)                                                          | 1.02 (0.92, 1.91)             |
| Autoimmune¶                                                                                                                                                                                                                                   | 376,088        | 927           | 943       | 66.0 (58.6, 72.5)                                            | 63.6 (57.9, 68.7)    | 2.5 (-6.9, 10.9)                                                         | 1.04 (0.90, 1.17)             |
| Herpes zoster or simplex                                                                                                                                                                                                                      | 387,056        | 710           | 669       | 43.3 (39.5, 47.0)                                            | 41.8 (38.1, 46.0)    | 1.5 (-4.7, 6.1)                                                          | 1.04 (0.90, 1.15)             |
| Arthritis or arthropathy                                                                                                                                                                                                                      | 397,732        | 809           | 755       | 48.0 (44.8, 52.4)                                            | 45.4 (41.2, 49.3)    | 2.6 (-2.1, 9.3)                                                          | 1.06 (0.96, 1.23)             |
| Pneumonia                                                                                                                                                                                                                                     | 379,978        | 1,608         | 1,336     | 111.7 (105.5, 120.6)                                         | 90.8 (86.1, 98.9)    | 20.9 (11.4, 29.5)                                                        | 1.23 (1.12, 1.34)             |

Abbreviation: CI, confidence interval.

\* Persons newly vaccinated with the BNT162b2 vaccine were matched in a 1:1 ratio to persons newly vaccinated with the mRNA-1273 vaccine according to the following variables: calendar date, age, sex, race, urbanicity of residence, and geographic location coded as categories of Veterans Integrated Services Network.

† Neurologic events included Bell's palsy, non-facial paralysis, paresthesia, seizure, syncope, and vertigo.

‡ Hematologic events included anemia, lymphopenia, neutropenia, and thrombocytopenia.

§ Other thromboembolic events included cerebral venous sinus thrombosis, deep venous thrombosis or thrombophlebitis, pulmonary embolism, and other thrombosis (arterial embolism and thrombosis, vascular insufficiency of the intestine).

¶ Autoimmune events included Guillain-Barré syndrome, inflammatory bowel disease, multiple sclerosis, psoriasis, rheumatoid arthritis, systemic lupus erythematosus, and uveitis.

## eTable 6. Secondary Analysis: Evaluating 14-Day Risk

| <b>eTable 6.</b> Secondary Analysis: Evaluating 14-day Risk: Estimated Comparative Safety of the BNT162b2 and mRNA-1273 Vaccines, Veterans Health Administration (January 4–October 5, 2021).* |                |               |           |                                                             |                   |                                                                          |                               |  |
|------------------------------------------------------------------------------------------------------------------------------------------------------------------------------------------------|----------------|---------------|-----------|-------------------------------------------------------------|-------------------|--------------------------------------------------------------------------|-------------------------------|--|
| Event                                                                                                                                                                                          | No. of persons | No. of events |           | 14-day risk<br><i>no. of events/10,000 persons (95% CI)</i> |                   | Risk difference<br><i>no. of events/<br/>10,000 persons<br/>(95% CI)</i> | Risk ratio<br><i>(95% CI)</i> |  |
|                                                                                                                                                                                                |                | BNT162b2      | mRNA-1273 | BNT162b2                                                    | mRNA-1273         |                                                                          |                               |  |
| Neurologic†                                                                                                                                                                                    | 233,970        | 188           | 185       | 16.1 (14.7, 19.4)                                           | 15.8 (14.0, 18.8) | 0.3 (-2.5, 4.2)                                                          | 1.02 (0.86, 1.29)             |  |
| Hematologic‡                                                                                                                                                                                   | 279,014        | 247           | 244       | 17.7 (15.5, 20.3)                                           | 17.5 (15.0, 19.4) | 0.2 (-2.7, 3.9)                                                          | 1.01 (0.86, 1.24)             |  |
| Hemorrhagic stroke                                                                                                                                                                             | 431,508        | 3             | 4         | 0.1 (0.0, 0.3)                                              | 0.2 (0.0, 0.4)    | 0.0 (-0.3, 0.2)                                                          | 0.75 (0.00, 4.00)             |  |
| Ischemic stroke                                                                                                                                                                                | 392,262        | 59            | 57        | 3.0 (2.1, 3.8)                                              | 2.9 (2.4, 4.1)    | 0.1 (-1.3, 0.9)                                                          | 1.03 (0.65, 1.35)             |  |
| Myocardial infarction                                                                                                                                                                          | 406,136        | 54            | 40        | 2.7 (2.0, 3.5)                                              | 2.0 (1.6, 2.8)    | 0.7 (-0.4, 1.6)                                                          | 1.35 (0.86, 1.94)             |  |
| Other thromboembolic§                                                                                                                                                                          | 402,126        | 54            | 56        | 2.7 (2.2, 3.7)                                              | 2.8 (2.0, 3.5)    | -0.1 (-0.9, 1.3)                                                         | 0.96 (0.73, 1.57)             |  |
| Myocarditis or pericarditis                                                                                                                                                                    | 429,564        | 3             | 3         | 0.1 (0.0, 0.3)                                              | 0.1 (0.0, 0.3)    | 0.0 (-0.2, 0.2)                                                          | 1.00 (0.00, Inf)              |  |
| Arrhythmia                                                                                                                                                                                     | 277,438        | 171           | 172       | 12.3 (10.3, 14.2)                                           | 12.4 (10.1, 14.0) | -0.1 (-2.4, 3.0)                                                         | 0.99 (0.82, 1.29)             |  |
| Kidney injury                                                                                                                                                                                  | 356,008        | 100           | 82        | 5.6 (4.8, 7.2)                                              | 4.6 (3.4, 5.5)    | 1.0 (-0.1, 3.1)                                                          | 1.22 (0.97, 1.80)             |  |
| Appendicitis                                                                                                                                                                                   | 428,856        | 3             | 5         | 0.1 (0.0, 0.4)                                              | 0.2 (0.0, 0.4)    | -0.1 (-0.2, 0.3)                                                         | 0.60 (0.00, 7.55)             |  |
| Autoimmune¶                                                                                                                                                                                    | 376,088        | 65            | 51        | 3.5 (2.8, 4.5)                                              | 2.7 (1.9, 3.4)    | 0.7 (-0.1, 2.1)                                                          | 1.27 (0.97, 1.99)             |  |
| Herpes zoster or simplex                                                                                                                                                                       | 387,056        | 42            | 43        | 2.2 (1.7, 3.2)                                              | 2.2 (1.7, 3.1)    | -0.1 (-1.0, 1.1)                                                         | 0.98 (0.68, 1.56)             |  |
| Arthritis or arthropathy                                                                                                                                                                       | 397,732        | 60            | 44        | 3.0 (2.3, 3.8)                                              | 2.2 (1.4, 2.8)    | 0.8 (-0.1, 2.0)                                                          | 1.36 (0.95, 2.33)             |  |
| Pneumonia                                                                                                                                                                                      | 379,978        | 65            | 60        | 3.4 (2.5, 4.2)                                              | 3.2 (2.8, 4.5)    | 0.3 (-1.4, 0.9)                                                          | 1.08 (0.66, 1.33)             |  |

Abbreviation: CI, confidence interval.

\* Persons newly vaccinated with the BNT162b2 vaccine were matched in a 1:1 ratio to persons newly vaccinated with the mRNA-1273 vaccine according to the following variables: calendar date, age, sex, race, urbanicity of residence, and geographic location coded as categories of Veterans Integrated Services Network. Follow-up of a matched pair ended when either member developed a documented SARS-CoV-2 infection.

† Neurologic events included Bell's palsy, non-facial paralysis, paresthesia, seizure, syncope, and vertigo.

‡ Hematologic events included anemia, lymphopenia, neutropenia, and thrombocytopenia.

§ Other thromboembolic events included cerebral venous sinus thrombosis, deep venous thrombosis or thrombophlebitis, pulmonary embolism, and other thrombosis (arterial embolism and thrombosis, vascular insufficiency of the intestine).

¶ Autoimmune events included Guillain-Barré syndrome, inflammatory bowel disease, multiple sclerosis, psoriasis, rheumatoid arthritis, systemic lupus erythematosus, and uveitis.

## eTable 7: Secondary Analysis: Evaluating 42-Day Risk

**eTable 7.** Secondary Analysis: Evaluating 42-day Risk: Estimated Comparative Safety of the BNT162b2 and mRNA-1273 Vaccines, Veterans Health Administration (January 4–October 5, 2021).\*

| Event                       | No. of persons | No. of events |           | 42-day risk<br>no. of events/10,000 persons (95% CI) |                   | Risk difference<br>no. of events/<br>10,000 persons<br>(95% CI) | Risk ratio<br>(95% CI) |
|-----------------------------|----------------|---------------|-----------|------------------------------------------------------|-------------------|-----------------------------------------------------------------|------------------------|
|                             |                | BNT162b2      | mRNA-1273 | BNT162b2                                             | mRNA-1273         |                                                                 |                        |
| Neurologic†                 | 233,970        | 565           | 567       | 48.5 (47.0, 54.3)                                    | 48.7 (44.5, 52.3) | -0.2 (-3.4, 8.2)                                                | 1.00 (0.93, 1.18)      |
| Hematologic‡                | 279,014        | 731           | 681       | 52.6 (47.6, 55.7)                                    | 49.0 (45.7, 53.1) | 3.6 (-2.9, 7.7)                                                 | 1.07 (0.94, 1.17)      |
| Hemorrhagic stroke          | 431,508        | 15            | 15        | 0.7 (0.3, 1.1)                                       | 0.7 (0.3, 1.0)    | 0.0 (-0.4, 0.6)                                                 | 1.00 (0.50, 2.38)      |
| Ischemic stroke             | 392,262        | 205           | 168       | 10.5 (9.3, 11.9)                                     | 8.6 (7.7, 10.3)   | 1.9 (-0.3, 3.4)                                                 | 1.22 (0.97, 1.42)      |
| Myocardial infarction       | 406,136        | 167           | 120       | 8.3 (6.9, 9.3)                                       | 5.9 (5.5, 7.7)    | 2.3 (-0.1, 3.2)                                                 | 1.39 (0.99, 1.56)      |
| Other thromboembolic§       | 402,126        | 189           | 154       | 9.5 (8.9, 11.6)                                      | 7.7 (6.8, 9.4)    | 1.8 (0.2, 4.2)                                                  | 1.23 (1.02, 1.59)      |
| Myocarditis or pericarditis | 429,564        | 12            | 7         | 0.6 (0.3, 1.0)                                       | 0.3 (0.1, 0.6)    | 0.2 (-0.1, 0.7)                                                 | 1.72 (0.78, 5.78)      |
| Arrhythmia                  | 277,438        | 596           | 492       | 43.2 (39.0, 46.2)                                    | 35.6 (32.9, 39.8) | 7.5 (1.9, 11.5)                                                 | 1.21 (1.05, 1.34)      |
| Kidney injury               | 356,008        | 315           | 247       | 17.8 (16.6, 21.0)                                    | 13.9 (12.0, 15.6) | 3.8 (2.1, 8.0)                                                  | 1.28 (1.14, 1.63)      |
| Appendicitis                | 428,856        | 16            | 13        | 0.8 (0.4, 1.2)                                       | 0.6 (0.3, 1.0)    | 0.1 (-0.3, 0.6)                                                 | 1.23 (0.62, 2.56)      |
| Autoimmune¶                 | 376,088        | 169           | 179       | 9.0 (8.3, 10.9)                                      | 9.6 (7.9, 10.6)   | -0.5 (-1.5, 2.2)                                                | 0.94 (0.85, 1.27)      |
| Herpes zoster or simplex    | 387,056        | 133           | 124       | 6.9 (5.6, 8.0)                                       | 6.4 (5.4, 7.7)    | 0.5 (-1.4, 1.9)                                                 | 1.07 (0.80, 1.31)      |
| Arthritis or arthropathy    | 397,732        | 182           | 145       | 9.2 (7.4, 10.1)                                      | 7.3 (5.9, 8.3)    | 1.9 (-0.2, 3.6)                                                 | 1.25 (0.98, 1.61)      |
| Pneumonia                   | 379,978        | 206           | 183       | 10.9 (9.2, 12.3)                                     | 9.7 (8.7, 11.5)   | 1.2 (-1.7, 2.7)                                                 | 1.13 (0.85, 1.30)      |

Abbreviation: CI, confidence interval.

\* Persons newly vaccinated with the BNT162b2 vaccine were matched in a 1:1 ratio to persons newly vaccinated with the mRNA-1273 vaccine according to the following variables: calendar date, age, sex, race, urbanicity of residence, and geographic location coded as categories of Veterans Integrated Services Network. Follow-up of a matched pair ended when either member developed a documented SARS-CoV-2 infection.

† Neurologic events included Bell's palsy, non-facial paralysis, paresthesia, seizure, syncope, and vertigo.

‡ Hematologic events included anemia, lymphopenia, neutropenia, and thrombocytopenia.

§ Other thromboembolic events included cerebral venous sinus thrombosis, deep venous thrombosis or thrombophlebitis, pulmonary embolism, and other thrombosis (arterial embolism and thrombosis, vascular insufficiency of the intestine).

¶ Autoimmune events included Guillain-Barré syndrome, inflammatory bowel disease, multiple sclerosis, psoriasis, rheumatoid arthritis, systemic lupus erythematosus, and uveitis.

## eTable 8. Subgroup Analysis: Among Persons <40 Years of Age

**eTable 8.** Subgroup Analysis Among Persons <40 Years of Age: Estimated Comparative Safety of the BNT162b2 and mRNA-1273 Vaccines, Veterans Health Administration (January 4–October 5, 2021).\*

| Event                       | No. of persons | No. of events |           | 38-week risk<br>no. of events/10,000 persons (95% CI) |                      | Risk difference<br>no. of events/<br>10,000 persons<br>(95% CI) | Risk ratio<br>(95% CI) |
|-----------------------------|----------------|---------------|-----------|-------------------------------------------------------|----------------------|-----------------------------------------------------------------|------------------------|
|                             |                | BNT162b2      | mRNA-1273 | BNT162b2                                              | mRNA-1273            |                                                                 |                        |
| Neurologic†                 | 12,386         | 110           | 120       | 211.2 (180.5, 286.6)                                  | 357.6 (183.4, 554.8) | -146.4 (-337.2, 66.6)                                           | 0.59 (0.39, 1.34)      |
| Hematologic‡                | 15,866         | 72            | 78        | 160.1 (85.9, 256.9)                                   | 245.7 (85.9, 418.1)  | -85.7 (-261.0, 138.1)                                           | 0.65 (0.30, 2.44)      |
| Hemorrhagic stroke          | 18,638         | 0             | 0         | --                                                    | --                   | --                                                              | --                     |
| Ischemic stroke             | 18,458         | 5             | 2         | 5.7 (1.3, 12.3)                                       | 2.3 (0.0, 6.7)       | 3.4 (-3.8, 10.4)                                                | 2.49 (0.34, Inf)       |
| Myocardial infarction       | 18,586         | 5             | 3         | 5.6 (1.2, 10.1)                                       | 3.7 (0.0, 8.0)       | 1.9 (-4.3, 7.5)                                                 | 1.50 (0.18, Inf)       |
| Other thromboembolic§       | 18,312         | 11            | 11        | 81.3 (6.8, 232.7)                                     | 17.7 (4.4, 25.3)     | 63.6 (-12.5, 218.4)                                             | 4.59 (0.42, 28.33)     |
| Myocarditis or pericarditis | 18,574         | 5             | 2         | 6.4 (1.3, 12.1)                                       | 2.4 (0.0, 5.4)       | 4.0 (-1.8, 10.8)                                                | 2.66 (0.48, Inf)       |
| Arrhythmia                  | 16,572         | 40            | 39        | 60.2 (36.2, 84.9)                                     | 86.7 (35.0, 141.8)   | -26.5 (-87.0, 31.8)                                             | 0.69 (0.34, 1.81)      |
| Kidney injury               | 18,028         | 11            | 6         | 12.9 (7.9, 27.3)                                      | 7.3 (1.3, 12.8)      | 5.7 (-0.7, 21.5)                                                | 1.78 (0.94, 10.91)     |
| Appendicitis                | 18,334         | 11            | 8         | 13.1 (4.1, 24.3)                                      | 9.2 (3.9, 17.3)      | 4.0 (-7.8, 15.9)                                                | 1.43 (0.38, 4.57)      |
| Autoimmune¶                 | 17,114         | 38            | 33        | 72.2 (27.9, 133.7)                                    | 127.3 (30.4, 310.7)  | -55.1 (-265.9, 73.6)                                            | 0.57 (0.14, 2.71)      |
| Herpes zoster or simplex    | 16,776         | 32            | 38        | 61.7 (33.9, 92.6)                                     | 50.9 (32.3, 69.6)    | 10.7 (-22.5, 47.5)                                              | 1.21 (0.61, 2.19)      |
| Arthritis or arthropathy    | 17,940         | 26            | 12        | 34.7 (17.4, 129.8)                                    | 87.3 (8.1, 255.0)    | -52.5 (-208.3, 102.7)                                           | 0.40 (0.12, 9.75)      |
| Pneumonia                   | 17,818         | 6             | 6         | 7.0 (4.1, 18.8)                                       | 7.0 (1.3, 10.8)      | 0.0 (-2.7, 14.9)                                                | 1.00 (0.67, 9.46)      |

Abbreviation: CI, confidence interval.

\* Persons newly vaccinated with the BNT162b2 vaccine were matched in a 1:1 ratio to persons newly vaccinated with the mRNA-1273 vaccine according to the following variables: calendar date, age, sex, race, urbanicity of residence, and geographic location coded as categories of Veterans Integrated Services Network. Follow-up of a matched pair ended when either member developed a documented SARS-CoV-2 infection. The sum of events across subgroups may not equal the sum of events in the overall population because the entire analysis (including matching) was repeated after stratification of the population according to baseline characteristics.

† Neurologic events included Bell's palsy, non-facial paralysis, paresthesia, seizure, syncope, and vertigo.

‡ Hematologic events included anemia, lymphopenia, neutropenia, and thrombocytopenia.

§ Other thromboembolic events included cerebral venous sinus thrombosis, deep venous thrombosis or thrombophlebitis, pulmonary embolism, and other thrombosis (arterial embolism and thrombosis, vascular insufficiency of the intestine).

¶ Autoimmune events included Guillain-Barré syndrome, inflammatory bowel disease, multiple sclerosis, psoriasis, rheumatoid arthritis, systemic lupus erythematosus, and uveitis.

## eTable 9. Subgroup Analysis: Among Persons 40-69 Years of Age

**eTable 9.** Subgroup Analysis Among Persons 40-69 Years of Age: Estimated Comparative Safety of the BNT162b2 and mRNA-1273 Vaccines, Veterans Health Administration (January 4–October 5, 2021).\*

| Event                       | No. of persons | No. of events |           | 38-week risk<br>no. of events/10,000 persons (95% CI) |                      | Risk difference<br>no. of events/<br>10,000 persons<br>(95% CI) | Risk ratio<br>(95% CI) |
|-----------------------------|----------------|---------------|-----------|-------------------------------------------------------|----------------------|-----------------------------------------------------------------|------------------------|
|                             |                | BNT162b2      | mRNA-1273 | BNT162b2                                              | mRNA-1273            |                                                                 |                        |
| Neurologic†                 | 107,824        | 1,346         | 1,322     | 327.5 (288.7, 355.8)                                  | 322.6 (288.2, 344.8) | 4.9 (-40.0, 49.3)                                               | 1.02 (0.88, 1.17)      |
| Hematologic‡                | 138,370        | 1,381         | 1,396     | 266.3 (249.7, 330.6)                                  | 279.3 (244.4, 317.5) | -13.0 (-49.5, 62.3)                                             | 0.95 (0.84, 1.25)      |
| Hemorrhagic stroke          | 200,094        | 24            | 22        | 2.7 (1.9, 4.3)                                        | 2.4 (1.5, 3.6)       | 0.3 (-1.0, 2.1)                                                 | 1.14 (0.70, 2.28)      |
| Ischemic stroke             | 186,152        | 377           | 335       | 53.4 (48.5, 64.5)                                     | 47.7 (40.6, 54.2)    | 5.7 (-1.2, 19.3)                                                | 1.12 (0.98, 1.44)      |
| Myocardial infarction       | 190,546        | 329           | 264       | 46.7 (38.2, 52.7)                                     | 33.7 (29.0, 39.2)    | 13.1 (2.2, 20.5)                                                | 1.39 (1.06, 1.68)      |
| Other thromboembolic§       | 188,156        | 432           | 352       | 62.3 (53.8, 71.7)                                     | 48.9 (43.1, 57.8)    | 13.4 (1.6, 23.1)                                                | 1.27 (1.03, 1.51)      |
| Myocarditis or pericarditis | 199,244        | 30            | 22        | 11.5 (2.8, 19.5)                                      | 2.6 (1.5, 4.2)       | 8.8 (-0.3, 16.3)                                                | 4.36 (0.92, 7.69)      |
| Arrhythmia                  | 145,096        | 1,075         | 985       | 216.4 (183.4, 253.3)                                  | 181.0 (166.8, 208.2) | 35.4 (-11.0, 69.2)                                              | 1.20 (0.94, 1.39)      |
| Kidney injury               | 173,670        | 634           | 569       | 90.0 (87.6, 113.0)                                    | 87.6 (71.9, 103.5)   | 2.4 (-8.8, 34.2)                                                | 1.03 (0.91, 1.45)      |
| Appendicitis                | 198,640        | 42            | 37        | 7.5 (3.4, 15.0)                                       | 4.4 (2.9, 5.9)       | 3.1 (-1.4, 11.2)                                                | 1.70 (0.73, 3.94)      |
| Autoimmune¶                 | 174,510        | 382           | 416       | 62.0 (52.3, 77.2)                                     | 71.7 (55.4, 94.0)    | -9.7 (-30.3, 12.4)                                              | 0.86 (0.66, 1.20)      |
| Herpes zoster or simplex    | 180,126        | 317           | 290       | 50.0 (40.9, 64.7)                                     | 42.2 (34.8, 50.3)    | 7.8 (-5.0, 23.5)                                                | 1.18 (0.89, 1.63)      |
| Arthritis or arthropathy    | 182,534        | 417           | 362       | 61.1 (50.4, 74.1)                                     | 57.1 (44.8, 73.2)    | 4.0 (-15.6, 20.7)                                               | 1.07 (0.77, 1.43)      |
| Pneumonia                   | 178,580        | 434           | 422       | 73.0 (59.1, 88.9)                                     | 67.3 (55.4, 76.0)    | 5.7 (-10.5, 27.2)                                               | 1.09 (0.85, 1.45)      |

Abbreviation: CI, confidence interval.

\* Persons newly vaccinated with the BNT162b2 vaccine were matched in a 1:1 ratio to persons newly vaccinated with the mRNA-1273 vaccine according to the following variables: calendar date, age, sex, race, urbanicity of residence, and geographic location coded as categories of Veterans Integrated Services Network. Follow-up of a matched pair ended when either member developed a documented SARS-CoV-2 infection. The sum of events across subgroups may not equal the sum of events in the overall population because the entire analysis (including matching) was repeated after stratification of the population according to baseline characteristics.

† Neurologic events included Bell's palsy, non-facial paralysis, paresthesia, seizure, syncope, and vertigo.

‡ Hematologic events included anemia, lymphopenia, neutropenia, and thrombocytopenia.

§ Other thromboembolic events included cerebral venous sinus thrombosis, deep venous thrombosis or thrombophlebitis, pulmonary embolism, and other thrombosis (arterial embolism and thrombosis, vascular insufficiency of the intestine).

¶ Autoimmune events included Guillain-Barré syndrome, inflammatory bowel disease, multiple sclerosis, psoriasis, rheumatoid arthritis, systemic lupus erythematosus, and uveitis.

## eTable 10. Subgroup Analysis: Among Persons ≥70 Years of Age

| <b>eTable 10.</b> Subgroup Analysis Among Persons ≥70 Years of Age: Estimated Comparative Safety of the BNT162b2 and mRNA-1273 Vaccines, Veterans Health Administration (January 4–October 5, 2021).* |                |               |           |                                                       |                      |                                                                 |                        |
|-------------------------------------------------------------------------------------------------------------------------------------------------------------------------------------------------------|----------------|---------------|-----------|-------------------------------------------------------|----------------------|-----------------------------------------------------------------|------------------------|
| Event                                                                                                                                                                                                 | No. of persons | No. of events |           | 38-week risk<br>no. of events/10,000 persons (95% CI) |                      | Risk difference<br>no. of events/<br>10,000 persons<br>(95% CI) | Risk ratio<br>(95% CI) |
|                                                                                                                                                                                                       |                | BNT162b2      | mRNA-1273 | BNT162b2                                              | mRNA-1273            |                                                                 |                        |
| Neurologic†                                                                                                                                                                                           | 113,760        | 1,561         | 1,514     | 318.4 (300.3, 339.8)                                  | 300.4 (287.3, 319.8) | 18.0 (-9.5, 40.8)                                               | 1.06 (0.97, 1.14)      |
| Hematologic‡                                                                                                                                                                                          | 124,778        | 2,201         | 2,234     | 412.3 (387.6, 428.6)                                  | 410.9 (399.2, 442.5) | 1.4 (-41.4, 17.4)                                               | 1.00 (0.91, 1.04)      |
| Hemorrhagic stroke                                                                                                                                                                                    | 212,776        | 47            | 45        | 4.8 (3.5, 6.4)                                        | 4.5 (3.8, 6.8)       | 0.3 (-2.4, 1.8)                                                 | 1.06 (0.63, 1.44)      |
| Ischemic stroke                                                                                                                                                                                       | 187,652        | 811           | 655       | 97.8 (88.1, 103.1)                                    | 82.3 (75.1, 90.5)    | 15.5 (3.2, 23.2)                                                | 1.19 (1.04, 1.30)      |
| Myocardial infarction                                                                                                                                                                                 | 197,004        | 619           | 513       | 73.8 (69.1, 84.0)                                     | 60.7 (53.4, 64.5)    | 13.0 (7.6, 27.4)                                                | 1.21 (1.12, 1.50)      |
| Other thromboembolic§                                                                                                                                                                                 | 195,658        | 720           | 580       | 81.8 (75.5, 87.8)                                     | 68.9 (60.9, 73.7)    | 12.9 (5.3, 24.6)                                                | 1.19 (1.07, 1.39)      |
| Myocarditis or pericarditis                                                                                                                                                                           | 211,746        | 43            | 24        | 4.2 (2.9, 5.6)                                        | 2.6 (1.6, 3.8)       | 1.7 (0.0, 3.3)                                                  | 1.65 (1.01, 2.86)      |
| Arrhythmia                                                                                                                                                                                            | 115,770        | 1,790         | 1,664     | 353.0 (335.4, 371.3)                                  | 329.9 (316.5, 353.8) | 23.2 (-5.4, 43.3)                                               | 1.07 (0.98, 1.14)      |
| Kidney injury                                                                                                                                                                                         | 164,310        | 1,151         | 928       | 156.6 (150.6, 170.7)                                  | 132.2 (122.5, 143.2) | 24.4 (11.7, 42.6)                                               | 1.18 (1.08, 1.33)      |
| Appendicitis                                                                                                                                                                                          | 211,882        | 38            | 23        | 3.9 (3.1, 5.5)                                        | 2.4 (2.0, 4.7)       | 1.5 (-0.9, 2.7)                                                 | 1.61 (0.78, 2.23)      |
| Autoimmune¶                                                                                                                                                                                           | 184,464        | 494           | 475       | 69.2 (58.2, 75.0)                                     | 61.4 (54.6, 67.2)    | 7.8 (-5.7, 15.9)                                                | 1.13 (0.92, 1.29)      |
| Herpes zoster or simplex                                                                                                                                                                              | 190,154        | 327           | 337       | 38.6 (35.0, 44.1)                                     | 40.4 (35.8, 45.5)    | -1.8 (-8.7, 5.9)                                                | 0.96 (0.80, 1.16)      |
| Arthritis or arthropathy                                                                                                                                                                              | 197,258        | 362           | 371       | 42.8 (36.7, 46.6)                                     | 42.3 (36.0, 45.3)    | 0.6 (-6.4, 7.5)                                                 | 1.01 (0.85, 1.20)      |
| Pneumonia                                                                                                                                                                                             | 183,580        | 831           | 726       | 103.3 (94.0, 109.2)                                   | 93.1 (85.9, 102.0)   | 10.2 (-3.5, 18.6)                                               | 1.11 (0.97, 1.21)      |

Abbreviation: CI, confidence interval.

\* Persons newly vaccinated with the BNT162b2 vaccine were matched in a 1:1 ratio to persons newly vaccinated with the mRNA-1273 vaccine according to the following variables: calendar date, age, sex, race, urbanicity of residence, and geographic location coded as categories of Veterans Integrated Services Network. Follow-up of a matched pair ended when either member developed a documented SARS-CoV-2 infection. The sum of events across subgroups may not equal the sum of events in the overall population because the entire analysis (including matching) was repeated after stratification of the population according to baseline characteristics.

† Neurologic events included Bell's palsy, non-facial paralysis, paresthesia, seizure, syncope, and vertigo.

‡ Hematologic events included anemia, lymphopenia, neutropenia, and thrombocytopenia.

§ Other thromboembolic events included cerebral venous sinus thrombosis, deep venous thrombosis or thrombophlebitis, pulmonary embolism, and other thrombosis (arterial embolism and thrombosis, vascular insufficiency of the intestine).

¶ Autoimmune events included Guillain-Barré syndrome, inflammatory bowel disease, multiple sclerosis, psoriasis, rheumatoid arthritis, systemic lupus erythematosus, and uveitis.

## eTable 11. Subgroup Analysis: Among Persons of Black Race

**eTable 11.** Subgroup Analysis Among Persons of Black Race: Estimated Comparative Safety of the BNT162b2 and mRNA-1273 Vaccines, Veterans Health Administration (January 4–October 5, 2021).\*

| Event                       | No. of persons | No. of events |           | 38-week risk<br><i>no. of events/10,000 persons (95% CI)</i> |                      | Risk difference<br><i>no. of events/<br/>10,000 persons<br/>(95% CI)</i> | Risk ratio<br><i>(95% CI)</i> |
|-----------------------------|----------------|---------------|-----------|--------------------------------------------------------------|----------------------|--------------------------------------------------------------------------|-------------------------------|
|                             |                | BNT162b2      | mRNA-1273 | BNT162b2                                                     | mRNA-1273            |                                                                          |                               |
| Neurologic†                 | 44,340         | 560           | 524       | 324.7 (296.6, 371.5)                                         | 294.1 (275.3, 344.1) | 30.6 (-25.4, 77.9)                                                       | 1.10 (0.93, 1.27)             |
| Hematologic‡                | 48,516         | 735           | 701       | 395.0 (344.0, 440.6)                                         | 405.6 (347.7, 456.0) | -10.6 (-84.2, 68.4)                                                      | 0.97 (0.81, 1.18)             |
| Hemorrhagic stroke          | 86,356         | 16            | 12        | 4.6 (2.3, 7.1)                                               | 3.3 (2.1, 7.2)       | 1.3 (-3.4, 3.5)                                                          | 1.41 (0.45, 2.43)             |
| Ischemic stroke             | 78,060         | 222           | 221       | 75.8 (62.2, 84.3)                                            | 77.0 (63.6, 88.3)    | -1.2 (-20.5, 13.2)                                                       | 0.98 (0.76, 1.20)             |
| Myocardial infarction       | 82,244         | 174           | 119       | 52.9 (46.2, 71.2)                                            | 32.8 (28.6, 41.6)    | 20.1 (9.6, 38.6)                                                         | 1.61 (1.25, 2.26)             |
| Other thromboembolic§       | 80,586         | 295           | 189       | 95.8 (80.2, 105.8)                                           | 57.1 (51.1, 71.0)    | 38.7 (15.8, 49.0)                                                        | 1.68 (1.23, 1.91)             |
| Myocarditis or pericarditis | 86,034         | 14            | 9         | 3.4 (1.3, 5.0)                                               | 3.4 (1.5, 6.6)       | 0.0 (-3.8, 2.4)                                                          | 1.00 (0.32, 2.23)             |
| Arrhythmia                  | 59,766         | 537           | 473       | 272.7 (218.6, 318.5)                                         | 212.5 (194.4, 248.0) | 60.2 (-5.8, 104.6)                                                       | 1.28 (0.98, 1.48)             |
| Kidney injury               | 68,182         | 372           | 295       | 141.9 (130.0, 168.9)                                         | 118.1 (109.1, 170.6) | 23.8 (-28.0, 44.2)                                                       | 1.20 (0.83, 1.37)             |
| Appendicitis                | 86,234         | 15            | 19        | 4.0 (2.4, 6.7)                                               | 4.9 (2.1, 6.2)       | -1.0 (-2.6, 3.5)                                                         | 0.80 (0.50, 2.37)             |
| Autoimmune¶                 | 75,892         | 169           | 199       | 58.7 (51.7, 80.0)                                            | 71.4 (54.7, 85.3)    | -12.7 (-24.4, 15.7)                                                      | 0.82 (0.70, 1.28)             |
| Herpes zoster or simplex    | 77,910         | 139           | 124       | 47.9 (37.1, 57.5)                                            | 42.8 (33.7, 53.4)    | 5.0 (-10.9, 17.1)                                                        | 1.12 (0.78, 1.47)             |
| Arthritis or arthropathy    | 77,490         | 210           | 184       | 76.1 (63.4, 100.7)                                           | 65.5 (49.7, 82.4)    | 10.6 (-9.2, 42.1)                                                        | 1.16 (0.89, 1.79)             |
| Pneumonia                   | 76,952         | 222           | 161       | 75.8 (63.7, 91.0)                                            | 58.6 (47.1, 71.2)    | 17.2 (-1.1, 37.7)                                                        | 1.29 (0.98, 1.77)             |

Abbreviation: CI, confidence interval.

\* Persons newly vaccinated with the BNT162b2 vaccine were matched in a 1:1 ratio to persons newly vaccinated with the mRNA-1273 vaccine according to the following variables: calendar date, age, sex, race, urbanicity of residence, and geographic location coded as categories of Veterans Integrated Services Network. Follow-up of a matched pair ended when either member developed a documented SARS-CoV-2 infection.

† Neurologic events included Bell's palsy, non-facial paralysis, paresthesia, seizure, syncope, and vertigo.

‡ Hematologic events included anemia, lymphopenia, neutropenia, and thrombocytopenia.

§ Other thromboembolic events included cerebral venous sinus thrombosis, deep venous thrombosis or thrombophlebitis, pulmonary embolism, and other thrombosis (arterial embolism and thrombosis, vascular insufficiency of the intestine).

¶ Autoimmune events included Guillain-Barré syndrome, inflammatory bowel disease, multiple sclerosis, psoriasis, rheumatoid arthritis, systemic lupus erythematosus, and uveitis.



## eTable 12. Subgroup Analysis: Among Persons of White Race

| <b>eTable 12.</b> Subgroup Analysis Among Persons of White Race: Estimated Comparative Safety of the BNT162b2 and mRNA-1273 Vaccines, Veterans Health Administration (January 4–October 5, 2021).* |                |               |           |                                                              |                      |                                                                          |                               |
|----------------------------------------------------------------------------------------------------------------------------------------------------------------------------------------------------|----------------|---------------|-----------|--------------------------------------------------------------|----------------------|--------------------------------------------------------------------------|-------------------------------|
| Event                                                                                                                                                                                              | No. of persons | No. of events |           | 38-week risk<br><i>no. of events/10,000 persons (95% CI)</i> |                      | Risk difference<br><i>no. of events/<br/>10,000 persons<br/>(95% CI)</i> | Risk ratio<br><i>(95% CI)</i> |
|                                                                                                                                                                                                    |                | BNT162b2      | mRNA-1273 | BNT162b2                                                     | mRNA-1273            |                                                                          |                               |
| Neurologic†                                                                                                                                                                                        | 177,754        | 2,327         | 2,281     | 319.3 (298.8, 333.6)                                         | 307.1 (293.8, 322.2) | 12.2 (-14.7, 30.9)                                                       | 1.04 (0.95, 1.10)             |
| Hematologic‡                                                                                                                                                                                       | 216,226        | 2,789         | 2,916     | 329.3 (315.8, 353.5)                                         | 349.8 (322.7, 358.2) | -20.5 (-30.9, 19.0)                                                      | 0.94 (0.91, 1.06)             |
| Hemorrhagic stroke                                                                                                                                                                                 | 323,704        | 61            | 50        | 4.3 (3.0, 5.1)                                               | 3.5 (2.7, 5.0)       | 0.8 (-1.4, 1.6)                                                          | 1.23 (0.68, 1.57)             |
| Ischemic stroke                                                                                                                                                                                    | 294,562        | 937           | 751       | 77.8 (71.4, 83.2)                                            | 67.3 (59.4, 72.2)    | 10.5 (2.4, 20.4)                                                         | 1.16 (1.03, 1.33)             |
| Myocardial infarction                                                                                                                                                                              | 303,552        | 766           | 616       | 66.0 (57.8, 71.0)                                            | 49.1 (45.6, 55.9)    | 16.9 (5.1, 22.6)                                                         | 1.34 (1.09, 1.48)             |
| Other thromboembolic§                                                                                                                                                                              | 301,312        | 849           | 694       | 66.4 (61.6, 71.0)                                            | 56.4 (53.9, 65.6)    | 10.0 (-0.7, 13.9)                                                        | 1.18 (0.99, 1.25)             |
| Myocarditis or pericarditis                                                                                                                                                                        | 322,136        | 59            | 38        | 4.3 (3.3, 5.8)                                               | 2.9 (1.9, 3.7)       | 1.4 (0.3, 3.3)                                                           | 1.49 (1.11, 2.58)             |
| Arrhythmia                                                                                                                                                                                         | 203,122        | 2,254         | 2,082     | 275.9 (266.0, 292.6)                                         | 269.8 (252.9, 280.2) | 6.1 (-7.1, 30.5)                                                         | 1.02 (0.97, 1.12)             |
| Kidney injury                                                                                                                                                                                      | 269,786        | 1,405         | 1,143     | 129.2 (118.6, 136.2)                                         | 105.8 (98.1, 113.8)  | 23.4 (8.3, 33.9)                                                         | 1.22 (1.08, 1.34)             |
| Appendicitis                                                                                                                                                                                       | 321,272        | 73            | 52        | 5.6 (3.9, 7.3)                                               | 4.0 (2.8, 5.1)       | 1.6 (-0.4, 3.8)                                                          | 1.41 (0.91, 2.26)             |
| Autoimmune¶                                                                                                                                                                                        | 281,504        | 696           | 666       | 65.1 (58.2, 74.2)                                            | 62.0 (55.3, 67.8)    | 3.1 (-5.8, 14.1)                                                         | 1.05 (0.91, 1.24)             |
| Herpes zoster or simplex                                                                                                                                                                           | 289,924        | 526           | 497       | 43.2 (38.3, 47.1)                                            | 41.4 (37.5, 47.2)    | 1.8 (-6.0, 7.0)                                                          | 1.04 (0.87, 1.18)             |
| Arthritis or arthropathy                                                                                                                                                                           | 300,316        | 575           | 531       | 44.7 (38.8, 47.4)                                            | 42.5 (38.5, 46.4)    | 2.2 (-5.3, 6.0)                                                          | 1.05 (0.88, 1.15)             |
| Pneumonia                                                                                                                                                                                          | 283,728        | 995           | 945       | 88.2 (80.1, 93.2)                                            | 82.9 (78.3, 92.3)    | 5.3 (-8.3, 11.5)                                                         | 1.06 (0.91, 1.15)             |

Abbreviation: CI, confidence interval.

\* Persons newly vaccinated with the BNT162b2 vaccine were matched in a 1:1 ratio to persons newly vaccinated with the mRNA-1273 vaccine according to the following variables: calendar date, age, sex, race, urbanicity of residence, and geographic location coded as categories of Veterans Integrated Services Network. Follow-up of a matched pair ended when either member developed a documented SARS-CoV-2 infection.

† Neurologic events included Bell's palsy, non-facial paralysis, paresthesia, seizure, syncope, and vertigo.

‡ Hematologic events included anemia, lymphopenia, neutropenia, and thrombocytopenia.

§ Other thromboembolic events included cerebral venous sinus thrombosis, deep venous thrombosis or thrombophlebitis, pulmonary embolism, and other thrombosis (arterial embolism and thrombosis, vascular insufficiency of the intestine).

¶ Autoimmune events included Guillain-Barré syndrome, inflammatory bowel disease, multiple sclerosis, psoriasis, rheumatoid arthritis, systemic lupus erythematosus, and uveitis.

## eReference

1. Chapman A, Peterson K, Turano A, Box T, Wallace K, Jones M. A Natural Language Processing System for National COVID-19 Surveillance in the US Department of Veterans Affairs. Proceedings of the 1st Workshop on NLP for COVID-19 at Association for Computational Linguistics 2020. <https://www.aclweb.org/anthology/2020.nlpCOVID19-acl.10>
